# Supplementary material for: A foundation model for multi-task cross-distribution restoration of fluorescence microscopy image
Source: Research Square preprint supplement (doi:10.21203/rs.3.rs-7431973/v1), 2025-09-05
Supplement: Supplementary file 1 [file 4853d97790ca196dec1848f7.xlsx]

## Sheet: Sheet1
Supplementary Table 5 | Detailed information of the internal, external datasets, and datasets used for segmentation evaluation. ID, dataset name; IN, id of internal datasets; IN (Fig. 2a), id of internal datasets shown in Fig. 2a; EX, id of external unseen datasets; RAW, input low-quality image; GT, ground truth image; n, number of samples (images) used for evaluation.
ID	IN	IN (Fig. 2a)	EX	FT	SEG	Task	Imaging object	Image size (RAW)	Image size (GT)	n	task#	sample	structure#	fluorescence indicator	input microscope-device	input microscope-params	input pixel size	target microscope-device	target microscope-params	target pixel size
biosr-cpp-sr-1	0	0				SR	CCP	502 x 502	1004 x 1004	8	super-resolution with a scale factor of 2	fixed COS-7 cell line	clathrin-coated pits	mEmerald (GFP)	wide-field microscope	with excitation numerical aperture (NA) of 1.41, detection numerical aperture (NA) of 1.3	62.6 x 62.6 nm. nearest interpolation with a factor of 2.	linear structured illumination microscope	with excitation numerical aperture (NA) of 1.41, detection numerical aperture (NA) of 1.3	31.3 x 31.3 nm
biosr-cpp-sr-2	1					SR	CCP	502 x 502	1004 x 1004	8	super-resolution with a scale factor of 2	fixed COS-7 cell line	clathrin-coated pits	mEmerald (GFP)	wide-field microscope	with excitation numerical aperture (NA) of 1.41, detection numerical aperture (NA) of 1.3	62.6 x 62.6 nm. nearest interpolation with a factor of 2.	linear structured illumination microscope	with excitation numerical aperture (NA) of 1.41, detection numerical aperture (NA) of 1.3	31.3 x 31.3 nm
biosr-cpp-sr-3	2					SR	CCP	502 x 502	1004 x 1004	8	super-resolution with a scale factor of 2	fixed COS-7 cell line	clathrin-coated pits	mEmerald (GFP)	wide-field microscope	with excitation numerical aperture (NA) of 1.41, detection numerical aperture (NA) of 1.3	62.6 x 62.6 nm. nearest interpolation with a factor of 2.	linear structured illumination microscope	with excitation numerical aperture (NA) of 1.41, detection numerical aperture (NA) of 1.3	31.3 x 31.3 nm
biosr-cpp-sr-4	3					SR	CCP	502 x 502	1004 x 1004	8	super-resolution with a scale factor of 2	fixed COS-7 cell line	clathrin-coated pits	mEmerald (GFP)	wide-field microscope	with excitation numerical aperture (NA) of 1.41, detection numerical aperture (NA) of 1.3	62.6 x 62.6 nm. nearest interpolation with a factor of 2.	linear structured illumination microscope	with excitation numerical aperture (NA) of 1.41, detection numerical aperture (NA) of 1.3	31.3 x 31.3 nm
biosr-cpp-sr-5	4					SR	CCP	502 x 502	1004 x 1004	8	super-resolution with a scale factor of 2	fixed COS-7 cell line	clathrin-coated pits	mEmerald (GFP)	wide-field microscope	with excitation numerical aperture (NA) of 1.41, detection numerical aperture (NA) of 1.3	62.6 x 62.6 nm. nearest interpolation with a factor of 2.	linear structured illumination microscope	with excitation numerical aperture (NA) of 1.41, detection numerical aperture (NA) of 1.3	31.3 x 31.3 nm
biosr-cpp-sr-6	5	1				SR	CCP	502 x 502	1004 x 1004	8	super-resolution with a scale factor of 2	fixed COS-7 cell line	clathrin-coated pits	mEmerald (GFP)	wide-field microscope	with excitation numerical aperture (NA) of 1.41, detection numerical aperture (NA) of 1.3	62.6 x 62.6 nm. nearest interpolation with a factor of 2.	linear structured illumination microscope	with excitation numerical aperture (NA) of 1.41, detection numerical aperture (NA) of 1.3	31.3 x 31.3 nm
biosr-cpp-sr-7	6					SR	CCP	502 x 502	1004 x 1004	8	super-resolution with a scale factor of 2	fixed COS-7 cell line	clathrin-coated pits	mEmerald (GFP)	wide-field microscope	with excitation numerical aperture (NA) of 1.41, detection numerical aperture (NA) of 1.3	62.6 x 62.6 nm. nearest interpolation with a factor of 2.	linear structured illumination microscope	with excitation numerical aperture (NA) of 1.41, detection numerical aperture (NA) of 1.3	31.3 x 31.3 nm
biosr-cpp-sr-8	7					SR	CCP	502 x 502	1004 x 1004	8	super-resolution with a scale factor of 2	fixed COS-7 cell line	clathrin-coated pits	mEmerald (GFP)	wide-field microscope	with excitation numerical aperture (NA) of 1.41, detection numerical aperture (NA) of 1.3	62.6 x 62.6 nm. nearest interpolation with a factor of 2.	linear structured illumination microscope	with excitation numerical aperture (NA) of 1.41, detection numerical aperture (NA) of 1.3	31.3 x 31.3 nm
biosr-cpp-sr-9	8					SR	CCP	502 x 502	1004 x 1004	8	super-resolution with a scale factor of 2	fixed COS-7 cell line	clathrin-coated pits	mEmerald (GFP)	wide-field microscope	with excitation numerical aperture (NA) of 1.41, detection numerical aperture (NA) of 1.3	62.6 x 62.6 nm. nearest interpolation with a factor of 2.	linear structured illumination microscope	with excitation numerical aperture (NA) of 1.41, detection numerical aperture (NA) of 1.3	31.3 x 31.3 nm
biosr-er-sr-1	9	2				SR	ER	502 x 502	1004 x 1004	8	super-resolution with a scale factor of 2	fixed COS-7 cell line	endoplasmic reticulum	mEmerald (GFP)	wide-field microscope	with excitation numerical aperture (NA) of 1.35, detection numerical aperture (NA) of 1.3	62.6 x 62.6 nm. nearest interpolation with a factor of 2	linear structured illumination microscope	with excitation numerical aperture (NA) of 1.35, detection numerical aperture (NA) of 1.3	31.3 x 31.3 nm
biosr-er-sr-2	10					SR	ER	502 x 502	1004 x 1004	8	super-resolution with a scale factor of 2	fixed COS-7 cell line	endoplasmic reticulum	mEmerald (GFP)	wide-field microscope	with excitation numerical aperture (NA) of 1.35, detection numerical aperture (NA) of 1.3	62.6 x 62.6 nm. nearest interpolation with a factor of 2	linear structured illumination microscope	with excitation numerical aperture (NA) of 1.35, detection numerical aperture (NA) of 1.3	31.3 x 31.3 nm
biosr-er-sr-3	11					SR	ER	502 x 502	1004 x 1004	8	super-resolution with a scale factor of 2	fixed COS-7 cell line	endoplasmic reticulum	mEmerald (GFP)	wide-field microscope	with excitation numerical aperture (NA) of 1.35, detection numerical aperture (NA) of 1.3	62.6 x 62.6 nm. nearest interpolation with a factor of 2	linear structured illumination microscope	with excitation numerical aperture (NA) of 1.35, detection numerical aperture (NA) of 1.3	31.3 x 31.3 nm
biosr-er-sr-4	12					SR	ER	502 x 502	1004 x 1004	8	super-resolution with a scale factor of 2	fixed COS-7 cell line	endoplasmic reticulum	mEmerald (GFP)	wide-field microscope	with excitation numerical aperture (NA) of 1.35, detection numerical aperture (NA) of 1.3	62.6 x 62.6 nm. nearest interpolation with a factor of 2	linear structured illumination microscope	with excitation numerical aperture (NA) of 1.35, detection numerical aperture (NA) of 1.3	31.3 x 31.3 nm
biosr-er-sr-5	13					SR	ER	502 x 502	1004 x 1004	8	super-resolution with a scale factor of 2	fixed COS-7 cell line	endoplasmic reticulum	mEmerald (GFP)	wide-field microscope	with excitation numerical aperture (NA) of 1.35, detection numerical aperture (NA) of 1.3	62.6 x 62.6 nm. nearest interpolation with a factor of 2	linear structured illumination microscope	with excitation numerical aperture (NA) of 1.35, detection numerical aperture (NA) of 1.3	31.3 x 31.3 nm
biosr-er-sr-6	14	3				SR	ER	502 x 502	1004 x 1004	8	super-resolution with a scale factor of 2	fixed COS-7 cell line	endoplasmic reticulum	mEmerald (GFP)	wide-field microscope	with excitation numerical aperture (NA) of 1.35, detection numerical aperture (NA) of 1.3	62.6 x 62.6 nm. nearest interpolation with a factor of 2	linear structured illumination microscope	with excitation numerical aperture (NA) of 1.35, detection numerical aperture (NA) of 1.3	31.3 x 31.3 nm
biosr-mt-sr-1	15	4				SR	MT	502 x 502	1004 x 1004	8	super-resolution with a scale factor of 2	fixed COS-7 cell line	microtubule	mEmerald (GFP)	wide-field microscope	with excitation numerical aperture (NA) of 1.35, detection numerical aperture (NA) of 1.3	62.6 x 62.6 nm. nearest interpolation with a factor of 2	linear structured illumination microscope	with excitation numerical aperture (NA) of 1.35, detection numerical aperture (NA) of 1.3	31.3 x 31.3 nm
biosr-mt-sr-2	16					SR	MT	502 x 502	1004 x 1004	8	super-resolution with a scale factor of 2	fixed COS-7 cell line	microtubule	mEmerald (GFP)	wide-field microscope	with excitation numerical aperture (NA) of 1.35, detection numerical aperture (NA) of 1.3	62.6 x 62.6 nm. nearest interpolation with a factor of 2	linear structured illumination microscope	with excitation numerical aperture (NA) of 1.35, detection numerical aperture (NA) of 1.3	31.3 x 31.3 nm
biosr-mt-sr-3	17					SR	MT	502 x 502	1004 x 1004	8	super-resolution with a scale factor of 2	fixed COS-7 cell line	microtubule	mEmerald (GFP)	wide-field microscope	with excitation numerical aperture (NA) of 1.35, detection numerical aperture (NA) of 1.3	62.6 x 62.6 nm. nearest interpolation with a factor of 2	linear structured illumination microscope	with excitation numerical aperture (NA) of 1.35, detection numerical aperture (NA) of 1.3	31.3 x 31.3 nm
biosr-mt-sr-4	18					SR	MT	502 x 502	1004 x 1004	8	super-resolution with a scale factor of 2	fixed COS-7 cell line	microtubule	mEmerald (GFP)	wide-field microscope	with excitation numerical aperture (NA) of 1.35, detection numerical aperture (NA) of 1.3	62.6 x 62.6 nm. nearest interpolation with a factor of 2	linear structured illumination microscope	with excitation numerical aperture (NA) of 1.35, detection numerical aperture (NA) of 1.3	31.3 x 31.3 nm
biosr-mt-sr-5	19					SR	MT	502 x 502	1004 x 1004	8	super-resolution with a scale factor of 2	fixed COS-7 cell line	microtubule	mEmerald (GFP)	wide-field microscope	with excitation numerical aperture (NA) of 1.35, detection numerical aperture (NA) of 1.3	62.6 x 62.6 nm. nearest interpolation with a factor of 2	linear structured illumination microscope	with excitation numerical aperture (NA) of 1.35, detection numerical aperture (NA) of 1.3	31.3 x 31.3 nm
biosr-mt-sr-6	20					SR	MT	502 x 502	1004 x 1004	8	super-resolution with a scale factor of 2	fixed COS-7 cell line	microtubule	mEmerald (GFP)	wide-field microscope	with excitation numerical aperture (NA) of 1.35, detection numerical aperture (NA) of 1.3	62.6 x 62.6 nm. nearest interpolation with a factor of 2	linear structured illumination microscope	with excitation numerical aperture (NA) of 1.35, detection numerical aperture (NA) of 1.3	31.3 x 31.3 nm
biosr-mt-sr-7	21					SR	MT	502 x 502	1004 x 1004	8	super-resolution with a scale factor of 2	fixed COS-7 cell line	microtubule	mEmerald (GFP)	wide-field microscope	with excitation numerical aperture (NA) of 1.35, detection numerical aperture (NA) of 1.3	62.6 x 62.6 nm. nearest interpolation with a factor of 2	linear structured illumination microscope	with excitation numerical aperture (NA) of 1.35, detection numerical aperture (NA) of 1.3	31.3 x 31.3 nm
biosr-mt-sr-8	22					SR	MT	502 x 502	1004 x 1004	8	super-resolution with a scale factor of 2	fixed COS-7 cell line	microtubule	mEmerald (GFP)	wide-field microscope	with excitation numerical aperture (NA) of 1.35, detection numerical aperture (NA) of 1.3	62.6 x 62.6 nm. nearest interpolation with a factor of 2	linear structured illumination microscope	with excitation numerical aperture (NA) of 1.35, detection numerical aperture (NA) of 1.3	31.3 x 31.3 nm
biosr-mt-sr-9	23	5				SR	MT	502 x 502	1004 x 1004	8	super-resolution with a scale factor of 2	fixed COS-7 cell line	microtubule	mEmerald (GFP)	wide-field microscope	with excitation numerical aperture (NA) of 1.35, detection numerical aperture (NA) of 1.3	62.6 x 62.6 nm. nearest interpolation with a factor of 2	linear structured illumination microscope	with excitation numerical aperture (NA) of 1.35, detection numerical aperture (NA) of 1.3	31.3 x 31.3 nm
biosr-actin-sr-1	24	6				SR	F-actin	502 x 502	1004 x 1004	8	super-resolution with a scale factor of 2	fixed COS-7 cell line	actin filament	mEmerald (GFP)	wide-field microscope	with excitation numerical aperture (NA) of 1.41, detection numerical aperture (NA) of 1.3	62.6 x 62.6 nm. nearest interpolation with a factor of 2	linear structured illumination microscope	with excitation numerical aperture (NA) of 1.41, detection numerical aperture (NA) of 1.3	31.3 x 31.3 nm
biosr-actin-sr-2	25					SR	F-actin	502 x 502	1004 x 1004	8	super-resolution with a scale factor of 2	fixed COS-7 cell line	actin filament	mEmerald (GFP)	wide-field microscope	with excitation numerical aperture (NA) of 1.41, detection numerical aperture (NA) of 1.3	62.6 x 62.6 nm. nearest interpolation with a factor of 2	linear structured illumination microscope	with excitation numerical aperture (NA) of 1.41, detection numerical aperture (NA) of 1.3	31.3 x 31.3 nm
biosr-actin-sr-3	26					SR	F-actin	502 x 502	1004 x 1004	8	super-resolution with a scale factor of 2	fixed COS-7 cell line	actin filament	mEmerald (GFP)	wide-field microscope	with excitation numerical aperture (NA) of 1.41, detection numerical aperture (NA) of 1.3	62.6 x 62.6 nm. nearest interpolation with a factor of 2	linear structured illumination microscope	with excitation numerical aperture (NA) of 1.41, detection numerical aperture (NA) of 1.3	31.3 x 31.3 nm
biosr-actin-sr-4	27					SR	F-actin	502 x 502	1004 x 1004	8	super-resolution with a scale factor of 2	fixed COS-7 cell line	actin filament	mEmerald (GFP)	wide-field microscope	with excitation numerical aperture (NA) of 1.41, detection numerical aperture (NA) of 1.3	62.6 x 62.6 nm. nearest interpolation with a factor of 2	linear structured illumination microscope	with excitation numerical aperture (NA) of 1.41, detection numerical aperture (NA) of 1.3	31.3 x 31.3 nm
biosr-actin-sr-5	28					SR	F-actin	502 x 502	1004 x 1004	8	super-resolution with a scale factor of 2	fixed COS-7 cell line	actin filament	mEmerald (GFP)	wide-field microscope	with excitation numerical aperture (NA) of 1.41, detection numerical aperture (NA) of 1.3	62.6 x 62.6 nm. nearest interpolation with a factor of 2	linear structured illumination microscope	with excitation numerical aperture (NA) of 1.41, detection numerical aperture (NA) of 1.3	31.3 x 31.3 nm
biosr-actin-sr-6	29					SR	F-actin	502 x 502	1004 x 1004	8	super-resolution with a scale factor of 2	fixed COS-7 cell line	actin filament	mEmerald (GFP)	wide-field microscope	with excitation numerical aperture (NA) of 1.41, detection numerical aperture (NA) of 1.3	62.6 x 62.6 nm. nearest interpolation with a factor of 2	linear structured illumination microscope	with excitation numerical aperture (NA) of 1.41, detection numerical aperture (NA) of 1.3	31.3 x 31.3 nm
biosr-actin-sr-7	30					SR	F-actin	502 x 502	1004 x 1004	8	super-resolution with a scale factor of 2	fixed COS-7 cell line	actin filament	mEmerald (GFP)	wide-field microscope	with excitation numerical aperture (NA) of 1.41, detection numerical aperture (NA) of 1.3	62.6 x 62.6 nm. nearest interpolation with a factor of 2	linear structured illumination microscope	with excitation numerical aperture (NA) of 1.41, detection numerical aperture (NA) of 1.3	31.3 x 31.3 nm
biosr-actin-sr-8	31					SR	F-actin	502 x 502	1004 x 1004	8	super-resolution with a scale factor of 2	fixed COS-7 cell line	actin filament	mEmerald (GFP)	wide-field microscope	with excitation numerical aperture (NA) of 1.41, detection numerical aperture (NA) of 1.3	62.6 x 62.6 nm. nearest interpolation with a factor of 2	linear structured illumination microscope	with excitation numerical aperture (NA) of 1.41, detection numerical aperture (NA) of 1.3	31.3 x 31.3 nm
biosr-actin-sr-9	32					SR	F-actin	502 x 502	1004 x 1004	8	super-resolution with a scale factor of 2	fixed COS-7 cell line	actin filament	mEmerald (GFP)	wide-field microscope	with excitation numerical aperture (NA) of 1.41, detection numerical aperture (NA) of 1.3	62.6 x 62.6 nm. nearest interpolation with a factor of 2	linear structured illumination microscope	with excitation numerical aperture (NA) of 1.41, detection numerical aperture (NA) of 1.3	31.3 x 31.3 nm
biosr-actin-sr-10	33					SR	F-actin	502 x 502	1004 x 1004	8	super-resolution with a scale factor of 2	fixed COS-7 cell line	actin filament	mEmerald (GFP)	wide-field microscope	with excitation numerical aperture (NA) of 1.41, detection numerical aperture (NA) of 1.3	62.6 x 62.6 nm. nearest interpolation with a factor of 2	linear structured illumination microscope	with excitation numerical aperture (NA) of 1.41, detection numerical aperture (NA) of 1.3	31.3 x 31.3 nm
biosr-actin-sr-11	34					SR	F-actin	502 x 502	1004 x 1004	8	super-resolution with a scale factor of 2	fixed COS-7 cell line	actin filament	mEmerald (GFP)	wide-field microscope	with excitation numerical aperture (NA) of 1.41, detection numerical aperture (NA) of 1.3	62.6 x 62.6 nm. nearest interpolation with a factor of 2	linear structured illumination microscope	with excitation numerical aperture (NA) of 1.41, detection numerical aperture (NA) of 1.3	31.3 x 31.3 nm
biosr-actin-sr-12	35	7				SR	F-actin	502 x 502	1004 x 1004	8	super-resolution with a scale factor of 2	fixed COS-7 cell line	actin filament	mEmerald (GFP)	wide-field microscope	with excitation numerical aperture (NA) of 1.41, detection numerical aperture (NA) of 1.3	62.6 x 62.6 nm. nearest interpolation with a factor of 2	linear structured illumination microscope	with excitation numerical aperture (NA) of 1.41, detection numerical aperture (NA) of 1.3	31.3 x 31.3 nm
deepbacs-sim-ecoli-sr	36	8				SR	membrane	1024 x 1024	1024 x 1024	5	super-resolution with a scale factor of 2	live E. coli cell	membrane	FM5-95 (green)	wide-field microscope	with an Olympus 60x 1.42NA Oil immersion objective. Oil refractive index 1.522.	80 x 80 nm. Nearest interpolation with a factor of 2	structured illumination microscope	with an Olympus 60x 1.42NA Oil immersion objective. Oil refractive index 1.522.	40 x 40 nm
deepbacs-sim-saureus-sr	37	9				SR	membrane	1024 x 1024	1024 x 1024	5	super-resolution with a scale factor of 2	live S. aureus cell	membrane	Nile Red (red)	wide-field microscope	with an Olympus 60x 1.42NA Oil immersion objective. Oil refractive index 1.522.	80 x 80 nm. Nearest interpolation with a factor of 2	structured illumination microscope	with an Olympus 60x 1.42NA Oil immersion objective. Oil refractive index 1.522.	40 x 40 nm
w2s-c0-sr-1	38	10				SR	Mito	512 x 512	1024 x 1024	8	super-resolution with a scale factor of 2	human cell	mitochondria	Alexa Fluor 488 (green)	wide-field microscope	with a Plan Apochromat TIRF 100X, 1.49-NA objective.	100 x 100 nm. Nearest interpolation with a factor of 2	structured illumination microscope	with a Plan Apochromat TIRF 100X, 1.49NA objective.	50 x 50 nm
w2s-c0-sr-2	39					SR	Mito	512 x 512	1024 x 1024	8	super-resolution with a scale factor of 2	human cell	mitochondria	Alexa Fluor 488 (green)	wide-field microscope	with a Plan Apochromat TIRF 100X, 1.49-NA objective.	100 x 100 nm. Nearest interpolation with a factor of 2	structured illumination microscope	with a Plan Apochromat TIRF 100X, 1.49NA objective.	50 x 50 nm
w2s-c0-sr-3	40					SR	Mito	512 x 512	1024 x 1024	8	super-resolution with a scale factor of 2	human cell	mitochondria	Alexa Fluor 488 (green)	wide-field microscope	with a Plan Apochromat TIRF 100X, 1.49-NA objective.	100 x 100 nm. Nearest interpolation with a factor of 2	structured illumination microscope	with a Plan Apochromat TIRF 100X, 1.49NA objective.	50 x 50 nm
w2s-c0-sr-4	41					SR	Mito	512 x 512	1024 x 1024	8	super-resolution with a scale factor of 2	human cell	mitochondria	Alexa Fluor 488 (green)	wide-field microscope	with a Plan Apochromat TIRF 100X, 1.49-NA objective.	100 x 100 nm. Nearest interpolation with a factor of 2	structured illumination microscope	with a Plan Apochromat TIRF 100X, 1.49NA objective.	50 x 50 nm
w2s-c0-sr-5	42					SR	Mito	512 x 512	1024 x 1024	8	super-resolution with a scale factor of 2	human cell	mitochondria	Alexa Fluor 488 (green)	wide-field microscope	with a Plan Apochromat TIRF 100X, 1.49-NA objective.	100 x 100 nm. Nearest interpolation with a factor of 2	structured illumination microscope	with a Plan Apochromat TIRF 100X, 1.49NA objective.	50 x 50 nm
w2s-c0-sr-6	43					SR	Mito	512 x 512	1024 x 1024	8	super-resolution with a scale factor of 2	human cell	mitochondria	Alexa Fluor 488 (green)	wide-field microscope	with a Plan Apochromat TIRF 100X, 1.49-NA objective.	100 x 100 nm. Nearest interpolation with a factor of 2	structured illumination microscope	with a Plan Apochromat TIRF 100X, 1.49NA objective.	50 x 50 nm
w2s-c0-sr-7	44	11				SR	Mito	512 x 512	1024 x 1024	8	super-resolution with a scale factor of 2	human cell	mitochondria	Alexa Fluor 488 (green)	wide-field microscope	with a Plan Apochromat TIRF 100X, 1.49-NA objective.	100 x 100 nm. Nearest interpolation with a factor of 2	structured illumination microscope	with a Plan Apochromat TIRF 100X, 1.49NA objective.	50 x 50 nm
w2s-c1-sr-1	45	12				SR	lysosome	512 x 512	1024 x 1024	8	super-resolution with a scale factor of 2	human cell	lysosome	Alexa Fluor 561 (yellow)	wide-field microscope	with a Plan Apochromat TIRF 100X, 1.49-NA objective.	100 x 100 nm. Nearest interpolation with a factor of 2	structured illumination microscope	with a Plan Apochromat TIRF 100X, 1.49NA objective.	50 x 50 nm
w2s-c1-sr-2	46					SR	lysosome	512 x 512	1024 x 1024	8	super-resolution with a scale factor of 2	human cell	lysosome	Alexa Fluor 561 (yellow)	wide-field microscope	with a Plan Apochromat TIRF 100X, 1.49-NA objective.	100 x 100 nm. Nearest interpolation with a factor of 2	structured illumination microscope	with a Plan Apochromat TIRF 100X, 1.49NA objective.	50 x 50 nm
w2s-c1-sr-3	47					SR	lysosome	512 x 512	1024 x 1024	8	super-resolution with a scale factor of 2	human cell	lysosome	Alexa Fluor 561 (yellow)	wide-field microscope	with a Plan Apochromat TIRF 100X, 1.49-NA objective.	100 x 100 nm. Nearest interpolation with a factor of 2	structured illumination microscope	with a Plan Apochromat TIRF 100X, 1.49NA objective.	50 x 50 nm
w2s-c1-sr-4	48					SR	lysosome	512 x 512	1024 x 1024	8	super-resolution with a scale factor of 2	human cell	lysosome	Alexa Fluor 561 (yellow)	wide-field microscope	with a Plan Apochromat TIRF 100X, 1.49-NA objective.	100 x 100 nm. Nearest interpolation with a factor of 2	structured illumination microscope	with a Plan Apochromat TIRF 100X, 1.49NA objective.	50 x 50 nm
w2s-c1-sr-5	49					SR	lysosome	512 x 512	1024 x 1024	8	super-resolution with a scale factor of 2	human cell	lysosome	Alexa Fluor 561 (yellow)	wide-field microscope	with a Plan Apochromat TIRF 100X, 1.49-NA objective.	100 x 100 nm. Nearest interpolation with a factor of 2	structured illumination microscope	with a Plan Apochromat TIRF 100X, 1.49NA objective.	50 x 50 nm
w2s-c1-sr-6	50					SR	lysosome	512 x 512	1024 x 1024	8	super-resolution with a scale factor of 2	human cell	lysosome	Alexa Fluor 561 (yellow)	wide-field microscope	with a Plan Apochromat TIRF 100X, 1.49-NA objective.	100 x 100 nm. Nearest interpolation with a factor of 2	structured illumination microscope	with a Plan Apochromat TIRF 100X, 1.49NA objective.	50 x 50 nm
w2s-c1-sr-7	51	13				SR	lysosome	512 x 512	1024 x 1024	8	super-resolution with a scale factor of 2	human cell	lysosome	Alexa Fluor 561 (yellow)	wide-field microscope	with a Plan Apochromat TIRF 100X, 1.49-NA objective.	100 x 100 nm. Nearest interpolation with a factor of 2	structured illumination microscope	with a Plan Apochromat TIRF 100X, 1.49NA objective.	50 x 50 nm
w2s-c2-sr-1	52	14				SR	F-actin	512 x 512	1024 x 1024	8	super-resolution with a scale factor of 2	human cell	actin filament	Alexa Fluor 640 (red)	wide-field microscope	with a Plan Apochromat TIRF 100X, 1.49-NA objective.	100 x 100 nm. Nearest interpolation with a factor of 2	structured illumination microscope	with a Plan Apochromat TIRF 100X, 1.49NA objective.	50 x 50 nm
w2s-c2-sr-2	53					SR	F-actin	512 x 512	1024 x 1024	8	super-resolution with a scale factor of 2	human cell	actin filament	Alexa Fluor 640 (red)	wide-field microscope	with a Plan Apochromat TIRF 100X, 1.49-NA objective.	100 x 100 nm. Nearest interpolation with a factor of 2	structured illumination microscope	with a Plan Apochromat TIRF 100X, 1.49NA objective.	50 x 50 nm
w2s-c2-sr-3	54					SR	F-actin	512 x 512	1024 x 1024	8	super-resolution with a scale factor of 2	human cell	actin filament	Alexa Fluor 640 (red)	wide-field microscope	with a Plan Apochromat TIRF 100X, 1.49-NA objective.	100 x 100 nm. Nearest interpolation with a factor of 2	structured illumination microscope	with a Plan Apochromat TIRF 100X, 1.49NA objective.	50 x 50 nm
w2s-c2-sr-4	55					SR	F-actin	512 x 512	1024 x 1024	8	super-resolution with a scale factor of 2	human cell	actin filament	Alexa Fluor 640 (red)	wide-field microscope	with a Plan Apochromat TIRF 100X, 1.49-NA objective.	100 x 100 nm. Nearest interpolation with a factor of 2	structured illumination microscope	with a Plan Apochromat TIRF 100X, 1.49NA objective.	50 x 50 nm
w2s-c2-sr-5	56					SR	F-actin	512 x 512	1024 x 1024	8	super-resolution with a scale factor of 2	human cell	actin filament	Alexa Fluor 640 (red)	wide-field microscope	with a Plan Apochromat TIRF 100X, 1.49-NA objective.	100 x 100 nm. Nearest interpolation with a factor of 2	structured illumination microscope	with a Plan Apochromat TIRF 100X, 1.49NA objective.	50 x 50 nm
w2s-c2-sr-6	57					SR	F-actin	512 x 512	1024 x 1024	8	super-resolution with a scale factor of 2	human cell	actin filament	Alexa Fluor 640 (red)	wide-field microscope	with a Plan Apochromat TIRF 100X, 1.49-NA objective.	100 x 100 nm. Nearest interpolation with a factor of 2	structured illumination microscope	with a Plan Apochromat TIRF 100X, 1.49NA objective.	50 x 50 nm
w2s-c2-sr-7	58	15				SR	F-actin	512 x 512	1024 x 1024	8	super-resolution with a scale factor of 2	human cell	actin filament	Alexa Fluor 640 (red)	wide-field microscope	with a Plan Apochromat TIRF 100X, 1.49-NA objective.	100 x 100 nm. Nearest interpolation with a factor of 2	structured illumination microscope	with a Plan Apochromat TIRF 100X, 1.49NA objective.	50 x 50 nm
srcaco2-h2b-sr-2	59	16			30	SR	histone	512 x 512	1024 x 1024	8	super-resolution with a scale factor of 2	Caco-2 cell	histone	mCherry (RFP)	confocal microscope	with a 20x/0.8-NA objective lens.	1000 x 1000 nm. Nearest interpolation with a factor of 2	confocal microscope	with a 20x/0.8NA objective lens.	500 x 500 nm
srcaco2-survivin-sr-2	60	17				SR	survivin	512 x 512	1024 x 1024	8	super-resolution with a scale factor of 2	Caco-2 cell	survivin	unknown	confocal microscope	with a 20x/0.8-NA objective lens.	1000 x 1000 nm. Nearest interpolation with a factor of 2	confocal microscope	with a 20x/0.8NA objective lens.	500 x 500 nm
srcaco2-tubulin-sr-2	61	18				SR	tubulin	512 x 512	1024 x 1024	8	super-resolution with a scale factor of 2	Caco-2 cell	tubulin	GFP (green)	confocal microscope	with a 20x/0.8-NA objective lens.	1000 x 1000 nm. Nearest interpolation with a factor of 2	confocal microscope	with a 20x/0.8NA objective lens.	500 x 500 nm
care-liver-iso	62				29	SR	nuclei/membrane	752 x 301	752 x 301	8	super-resolution with a factor of 8 in one dimension	mouse liver cell	nuclei	DAPI and phalloidin (blue)	two-photon laser-scanning microscope	with a 63x/1.3-NA glycerol-immersion objective (Zeiss)	2400 x 300 nm, interpolation with a factor of 8 in the first dimension	two-photon laser-scanning microscope	with a 63x/1.3-NA glycerol-immersion objective (Zeiss)	300 x 300 nm
vmsim5-mito-sr-crop	63					SR	Mito	464 x 464	928 x 928	8	super-resolution with a scale factor of 2	live U2OS cell	mitochondria	MitoTracker Green (green)	wide-field microscope	with a 60x, 1.45 NA oil-immersion objective.	80 x 80 nm. Nearest interpolation with a factor of 2	structured illumination microscope	with a 60x, 1.45 NA oil-immersion objective.	40 x 40 nm
rcan3d-c2s-mt-sr	64					SR	MT	511 x 511	1022 x 1022	6	super-resolution with a scale factor of 2	fixed mouse embryonic fibroblast cells	microtubule	ATTO 647 (red)	confocal microscope	with 100x 1.4 NA objective. Pinhole size is 0.7 arbitrary unit (A.U.).	50 x 50 nm. Nearest interpolation with a factor of 2	stimulated emission depletion microscope	with 100x 1.4 NA objective. Pinhole size is 0.7 arbitrary unit (A.U.).	25 x 25 nm
rcan3d-c2s-npc-sr	65					SR	NPC	511 x 511	1022 x 1022	6	super-resolution with a scale factor of 2	fixed mouse embryonic fibroblast cells	nuclear pore complex	Alexa Fluor 594 (red)	confocal microscope	with 100x 1.4 NA objective. Pinhole size is 0.7 arbitrary unit (A.U.).	50 x 50 nm. Nearest interpolation with a factor of 2	stimulated emission depletion microscope	with 100x 1.4 NA objective. Pinhole size is 0.7 arbitrary unit (A.U.).	25 x 25 nm
biosr-cpp-dcv-1	66	19				DCV	CCP	502 x 502	1004 x 1004	8	deconvolution	fixed COS-7 cell line	clathrin-coated pits	mEmerald (GFP)	wide-field microscope	with excitation numerical aperture (NA) of 1.41, detection numerical aperture (NA) of 1.3	62.6 x 62.6 nm	linear structured illumination microscope	with excitation numerical aperture (NA) of 1.41, detection numerical aperture (NA) of 1.3	62.6 x 62.6 nm
biosr-cpp-dcv-2	67					DCV	CCP	502 x 502	1004 x 1004	8	deconvolution	fixed COS-7 cell line	clathrin-coated pits	mEmerald (GFP)	wide-field microscope	with excitation numerical aperture (NA) of 1.41, detection numerical aperture (NA) of 1.3	62.6 x 62.6 nm	linear structured illumination microscope	with excitation numerical aperture (NA) of 1.41, detection numerical aperture (NA) of 1.3	62.6 x 62.6 nm
biosr-cpp-dcv-3	68					DCV	CCP	502 x 502	1004 x 1004	8	deconvolution	fixed COS-7 cell line	clathrin-coated pits	mEmerald (GFP)	wide-field microscope	with excitation numerical aperture (NA) of 1.41, detection numerical aperture (NA) of 1.3	62.6 x 62.6 nm	linear structured illumination microscope	with excitation numerical aperture (NA) of 1.41, detection numerical aperture (NA) of 1.3	62.6 x 62.6 nm
biosr-cpp-dcv-4	69					DCV	CCP	502 x 502	1004 x 1004	8	deconvolution	fixed COS-7 cell line	clathrin-coated pits	mEmerald (GFP)	wide-field microscope	with excitation numerical aperture (NA) of 1.41, detection numerical aperture (NA) of 1.3	62.6 x 62.6 nm	linear structured illumination microscope	with excitation numerical aperture (NA) of 1.41, detection numerical aperture (NA) of 1.3	62.6 x 62.6 nm
biosr-cpp-dcv-5	70					DCV	CCP	502 x 502	1004 x 1004	8	deconvolution	fixed COS-7 cell line	clathrin-coated pits	mEmerald (GFP)	wide-field microscope	with excitation numerical aperture (NA) of 1.41, detection numerical aperture (NA) of 1.3	62.6 x 62.6 nm	linear structured illumination microscope	with excitation numerical aperture (NA) of 1.41, detection numerical aperture (NA) of 1.3	62.6 x 62.6 nm
biosr-cpp-dcv-6	71					DCV	CCP	502 x 502	1004 x 1004	8	deconvolution	fixed COS-7 cell line	clathrin-coated pits	mEmerald (GFP)	wide-field microscope	with excitation numerical aperture (NA) of 1.41, detection numerical aperture (NA) of 1.3	62.6 x 62.6 nm	linear structured illumination microscope	with excitation numerical aperture (NA) of 1.41, detection numerical aperture (NA) of 1.3	62.6 x 62.6 nm
biosr-cpp-dcv-7	72					DCV	CCP	502 x 502	1004 x 1004	8	deconvolution	fixed COS-7 cell line	clathrin-coated pits	mEmerald (GFP)	wide-field microscope	with excitation numerical aperture (NA) of 1.41, detection numerical aperture (NA) of 1.3	62.6 x 62.6 nm	linear structured illumination microscope	with excitation numerical aperture (NA) of 1.41, detection numerical aperture (NA) of 1.3	62.6 x 62.6 nm
biosr-cpp-dcv-8	73					DCV	CCP	502 x 502	1004 x 1004	8	deconvolution	fixed COS-7 cell line	clathrin-coated pits	mEmerald (GFP)	wide-field microscope	with excitation numerical aperture (NA) of 1.41, detection numerical aperture (NA) of 1.3	62.6 x 62.6 nm	linear structured illumination microscope	with excitation numerical aperture (NA) of 1.41, detection numerical aperture (NA) of 1.3	62.6 x 62.6 nm
biosr-cpp-dcv-9	74	20				DCV	CCP	502 x 502	1004 x 1004	8	deconvolution	fixed COS-7 cell line	clathrin-coated pits	mEmerald (GFP)	wide-field microscope	with excitation numerical aperture (NA) of 1.41, detection numerical aperture (NA) of 1.3	62.6 x 62.6 nm	linear structured illumination microscope	with excitation numerical aperture (NA) of 1.41, detection numerical aperture (NA) of 1.3	62.6 x 62.6 nm
biosr-er-dcv-1	75	21			66	DCV	ER	502 x 502	1004 x 1004	8	deconvolution	fixed COS-7 cell line	endoplasmic reticulum	mEmerald (GFP)	wide-field microscope	with excitation numerical aperture (NA) of 1.35, detection numerical aperture (NA) of 1.3	62.6 x 62.6 nm	linear structured illumination microscope	with excitation numerical aperture (NA) of 1.35, detection numerical aperture (NA) of 1.3	62.6 x 62.6 nm
biosr-er-dcv-2	76				67	DCV	ER	502 x 502	1004 x 1004	8	deconvolution	fixed COS-7 cell line	endoplasmic reticulum	mEmerald (GFP)	wide-field microscope	with excitation numerical aperture (NA) of 1.35, detection numerical aperture (NA) of 1.3	62.6 x 62.6 nm	linear structured illumination microscope	with excitation numerical aperture (NA) of 1.35, detection numerical aperture (NA) of 1.3	62.6 x 62.6 nm
biosr-er-dcv-3	77				68	DCV	ER	502 x 502	1004 x 1004	8	deconvolution	fixed COS-7 cell line	endoplasmic reticulum	mEmerald (GFP)	wide-field microscope	with excitation numerical aperture (NA) of 1.35, detection numerical aperture (NA) of 1.3	62.6 x 62.6 nm	linear structured illumination microscope	with excitation numerical aperture (NA) of 1.35, detection numerical aperture (NA) of 1.3	62.6 x 62.6 nm
biosr-er-dcv-4	78				69	DCV	ER	502 x 502	1004 x 1004	8	deconvolution	fixed COS-7 cell line	endoplasmic reticulum	mEmerald (GFP)	wide-field microscope	with excitation numerical aperture (NA) of 1.35, detection numerical aperture (NA) of 1.3	62.6 x 62.6 nm	linear structured illumination microscope	with excitation numerical aperture (NA) of 1.35, detection numerical aperture (NA) of 1.3	62.6 x 62.6 nm
biosr-er-dcv-5	79				70	DCV	ER	502 x 502	1004 x 1004	8	deconvolution	fixed COS-7 cell line	endoplasmic reticulum	mEmerald (GFP)	wide-field microscope	with excitation numerical aperture (NA) of 1.35, detection numerical aperture (NA) of 1.3	62.6 x 62.6 nm	linear structured illumination microscope	with excitation numerical aperture (NA) of 1.35, detection numerical aperture (NA) of 1.3	62.6 x 62.6 nm
biosr-er-dcv-6	80	22			71	DCV	ER	502 x 502	1004 x 1004	8	deconvolution	fixed COS-7 cell line	endoplasmic reticulum	mEmerald (GFP)	wide-field microscope	with excitation numerical aperture (NA) of 1.35, detection numerical aperture (NA) of 1.3	62.6 x 62.6 nm	linear structured illumination microscope	with excitation numerical aperture (NA) of 1.35, detection numerical aperture (NA) of 1.3	62.6 x 62.6 nm
biosr-actin-dcv-1	81	25				DCV	F-actin	502 x 502	1004 x 1004	8	deconvolution	fixed COS-7 cell line	actin filament	mEmerald (GFP)	wide-field microscope	with excitation numerical aperture (NA) of 1.41, detection numerical aperture (NA) of 1.3	62.6 x 62.6 nm	linear structured illumination microscope	with excitation numerical aperture (NA) of 1.41, detection numerical aperture (NA) of 1.3	62.6 x 62.6 nm
biosr-actin-dcv-2	82					DCV	F-actin	502 x 502	1004 x 1004	8	deconvolution	fixed COS-7 cell line	actin filament	mEmerald (GFP)	wide-field microscope	with excitation numerical aperture (NA) of 1.41, detection numerical aperture (NA) of 1.3	62.6 x 62.6 nm	linear structured illumination microscope	with excitation numerical aperture (NA) of 1.41, detection numerical aperture (NA) of 1.3	62.6 x 62.6 nm
biosr-actin-dcv-3	83					DCV	F-actin	502 x 502	1004 x 1004	8	deconvolution	fixed COS-7 cell line	actin filament	mEmerald (GFP)	wide-field microscope	with excitation numerical aperture (NA) of 1.41, detection numerical aperture (NA) of 1.3	62.6 x 62.6 nm	linear structured illumination microscope	with excitation numerical aperture (NA) of 1.41, detection numerical aperture (NA) of 1.3	62.6 x 62.6 nm
biosr-actin-dcv-4	84					DCV	F-actin	502 x 502	1004 x 1004	8	deconvolution	fixed COS-7 cell line	actin filament	mEmerald (GFP)	wide-field microscope	with excitation numerical aperture (NA) of 1.41, detection numerical aperture (NA) of 1.3	62.6 x 62.6 nm	linear structured illumination microscope	with excitation numerical aperture (NA) of 1.41, detection numerical aperture (NA) of 1.3	62.6 x 62.6 nm
biosr-actin-dcv-5	85					DCV	F-actin	502 x 502	1004 x 1004	8	deconvolution	fixed COS-7 cell line	actin filament	mEmerald (GFP)	wide-field microscope	with excitation numerical aperture (NA) of 1.41, detection numerical aperture (NA) of 1.3	62.6 x 62.6 nm	linear structured illumination microscope	with excitation numerical aperture (NA) of 1.41, detection numerical aperture (NA) of 1.3	62.6 x 62.6 nm
biosr-actin-dcv-6	86					DCV	F-actin	502 x 502	1004 x 1004	8	deconvolution	fixed COS-7 cell line	actin filament	mEmerald (GFP)	wide-field microscope	with excitation numerical aperture (NA) of 1.41, detection numerical aperture (NA) of 1.3	62.6 x 62.6 nm	linear structured illumination microscope	with excitation numerical aperture (NA) of 1.41, detection numerical aperture (NA) of 1.3	62.6 x 62.6 nm
biosr-actin-dcv-7	87					DCV	F-actin	502 x 502	1004 x 1004	8	deconvolution	fixed COS-7 cell line	actin filament	mEmerald (GFP)	wide-field microscope	with excitation numerical aperture (NA) of 1.41, detection numerical aperture (NA) of 1.3	62.6 x 62.6 nm	linear structured illumination microscope	with excitation numerical aperture (NA) of 1.41, detection numerical aperture (NA) of 1.3	62.6 x 62.6 nm
biosr-actin-dcv-8	88					DCV	F-actin	502 x 502	1004 x 1004	8	deconvolution	fixed COS-7 cell line	actin filament	mEmerald (GFP)	wide-field microscope	with excitation numerical aperture (NA) of 1.41, detection numerical aperture (NA) of 1.3	62.6 x 62.6 nm	linear structured illumination microscope	with excitation numerical aperture (NA) of 1.41, detection numerical aperture (NA) of 1.3	62.6 x 62.6 nm
biosr-actin-dcv-9	89					DCV	F-actin	502 x 502	1004 x 1004	8	deconvolution	fixed COS-7 cell line	actin filament	mEmerald (GFP)	wide-field microscope	with excitation numerical aperture (NA) of 1.41, detection numerical aperture (NA) of 1.3	62.6 x 62.6 nm	linear structured illumination microscope	with excitation numerical aperture (NA) of 1.41, detection numerical aperture (NA) of 1.3	62.6 x 62.6 nm
biosr-actin-dcv-10	90					DCV	F-actin	502 x 502	1004 x 1004	8	deconvolution	fixed COS-7 cell line	actin filament	mEmerald (GFP)	wide-field microscope	with excitation numerical aperture (NA) of 1.41, detection numerical aperture (NA) of 1.3	62.6 x 62.6 nm	linear structured illumination microscope	with excitation numerical aperture (NA) of 1.41, detection numerical aperture (NA) of 1.3	62.6 x 62.6 nm
biosr-actin-dcv-11	91					DCV	F-actin	502 x 502	1004 x 1004	8	deconvolution	fixed COS-7 cell line	actin filament	mEmerald (GFP)	wide-field microscope	with excitation numerical aperture (NA) of 1.41, detection numerical aperture (NA) of 1.3	62.6 x 62.6 nm	linear structured illumination microscope	with excitation numerical aperture (NA) of 1.41, detection numerical aperture (NA) of 1.3	62.6 x 62.6 nm
biosr-actin-dcv-12	92	26				DCV	F-actin	502 x 502	1004 x 1004	8	deconvolution	fixed COS-7 cell line	actin filament	mEmerald (GFP)	wide-field microscope	with excitation numerical aperture (NA) of 1.41, detection numerical aperture (NA) of 1.3	62.6 x 62.6 nm	linear structured illumination microscope	with excitation numerical aperture (NA) of 1.41, detection numerical aperture (NA) of 1.3	62.6 x 62.6 nm
biosr-mt-dcv-1	93	23				DCV	MT	502 x 502	1004 x 1004	8	deconvolution	fixed COS-7 cell line	microtubule	mEmerald (GFP)	wide-field microscope	with excitation numerical aperture (NA) of 1.35, detection numerical aperture (NA) of 1.3	62.6 x 62.6 nm	linear structured illumination microscope	with excitation numerical aperture (NA) of 1.35, detection numerical aperture (NA) of 1.3	62.6 x 62.6 nm
biosr-mt-dcv-2	94					DCV	MT	502 x 502	1004 x 1004	8	deconvolution	fixed COS-7 cell line	microtubule	mEmerald (GFP)	wide-field microscope	with excitation numerical aperture (NA) of 1.35, detection numerical aperture (NA) of 1.3	62.6 x 62.6 nm	linear structured illumination microscope	with excitation numerical aperture (NA) of 1.35, detection numerical aperture (NA) of 1.3	62.6 x 62.6 nm
biosr-mt-dcv-3	95					DCV	MT	502 x 502	1004 x 1004	8	deconvolution	fixed COS-7 cell line	microtubule	mEmerald (GFP)	wide-field microscope	with excitation numerical aperture (NA) of 1.35, detection numerical aperture (NA) of 1.3	62.6 x 62.6 nm	linear structured illumination microscope	with excitation numerical aperture (NA) of 1.35, detection numerical aperture (NA) of 1.3	62.6 x 62.6 nm
biosr-mt-dcv-4	96					DCV	MT	502 x 502	1004 x 1004	8	deconvolution	fixed COS-7 cell line	microtubule	mEmerald (GFP)	wide-field microscope	with excitation numerical aperture (NA) of 1.35, detection numerical aperture (NA) of 1.3	62.6 x 62.6 nm	linear structured illumination microscope	with excitation numerical aperture (NA) of 1.35, detection numerical aperture (NA) of 1.3	62.6 x 62.6 nm
biosr-mt-dcv-5	97					DCV	MT	502 x 502	1004 x 1004	8	deconvolution	fixed COS-7 cell line	microtubule	mEmerald (GFP)	wide-field microscope	with excitation numerical aperture (NA) of 1.35, detection numerical aperture (NA) of 1.3	62.6 x 62.6 nm	linear structured illumination microscope	with excitation numerical aperture (NA) of 1.35, detection numerical aperture (NA) of 1.3	62.6 x 62.6 nm
biosr-mt-dcv-6	98					DCV	MT	502 x 502	1004 x 1004	8	deconvolution	fixed COS-7 cell line	microtubule	mEmerald (GFP)	wide-field microscope	with excitation numerical aperture (NA) of 1.35, detection numerical aperture (NA) of 1.3	62.6 x 62.6 nm	linear structured illumination microscope	with excitation numerical aperture (NA) of 1.35, detection numerical aperture (NA) of 1.3	62.6 x 62.6 nm
biosr-mt-dcv-7	99					DCV	MT	502 x 502	1004 x 1004	8	deconvolution	fixed COS-7 cell line	microtubule	mEmerald (GFP)	wide-field microscope	with excitation numerical aperture (NA) of 1.35, detection numerical aperture (NA) of 1.3	62.6 x 62.6 nm	linear structured illumination microscope	with excitation numerical aperture (NA) of 1.35, detection numerical aperture (NA) of 1.3	62.6 x 62.6 nm
biosr-mt-dcv-8	100					DCV	MT	502 x 502	1004 x 1004	8	deconvolution	fixed COS-7 cell line	microtubule	mEmerald (GFP)	wide-field microscope	with excitation numerical aperture (NA) of 1.35, detection numerical aperture (NA) of 1.3	62.6 x 62.6 nm	linear structured illumination microscope	with excitation numerical aperture (NA) of 1.35, detection numerical aperture (NA) of 1.3	62.6 x 62.6 nm
biosr-mt-dcv-9	101	24				DCV	MT	502 x 502	1004 x 1004	8	deconvolution	fixed COS-7 cell line	microtubule	mEmerald (GFP)	wide-field microscope	with excitation numerical aperture (NA) of 1.35, detection numerical aperture (NA) of 1.3	62.6 x 62.6 nm	linear structured illumination microscope	with excitation numerical aperture (NA) of 1.35, detection numerical aperture (NA) of 1.3	62.6 x 62.6 nm
biosr-actinnl-dcv-1	102	27				DCV	F-actin	502 x 502	1506 x 1506	8	deconvolution	fixed COS-7 cell line	actin filament	mEmerald (GFP)	wide-field microscope	with excitation numerical aperture (NA) of 1.41, detection numerical aperture (NA) of 1.3	62.6 x 62.6 nm	non-linear structured illumination microscope	with excitation numerical aperture (NA) of 1.41, detection numerical aperture (NA) of 1.3	62.6 x 62.6 nm
biosr-actinnl-dcv-2	103					DCV	F-actin	502 x 502	1506 x 1506	8	deconvolution	fixed COS-7 cell line	actin filament	mEmerald (GFP)	wide-field microscope	with excitation numerical aperture (NA) of 1.41, detection numerical aperture (NA) of 1.3	62.6 x 62.6 nm	non-linear structured illumination microscope	with excitation numerical aperture (NA) of 1.41, detection numerical aperture (NA) of 1.3	62.6 x 62.6 nm
biosr-actinnl-dcv-3	104					DCV	F-actin	502 x 502	1506 x 1506	8	deconvolution	fixed COS-7 cell line	actin filament	mEmerald (GFP)	wide-field microscope	with excitation numerical aperture (NA) of 1.41, detection numerical aperture (NA) of 1.3	62.6 x 62.6 nm	non-linear structured illumination microscope	with excitation numerical aperture (NA) of 1.41, detection numerical aperture (NA) of 1.3	62.6 x 62.6 nm
biosr-actinnl-dcv-4	105					DCV	F-actin	502 x 502	1506 x 1506	8	deconvolution	fixed COS-7 cell line	actin filament	mEmerald (GFP)	wide-field microscope	with excitation numerical aperture (NA) of 1.41, detection numerical aperture (NA) of 1.3	62.6 x 62.6 nm	non-linear structured illumination microscope	with excitation numerical aperture (NA) of 1.41, detection numerical aperture (NA) of 1.3	62.6 x 62.6 nm
biosr-actinnl-dcv-5	106					DCV	F-actin	502 x 502	1506 x 1506	8	deconvolution	fixed COS-7 cell line	actin filament	mEmerald (GFP)	wide-field microscope	with excitation numerical aperture (NA) of 1.41, detection numerical aperture (NA) of 1.3	62.6 x 62.6 nm	non-linear structured illumination microscope	with excitation numerical aperture (NA) of 1.41, detection numerical aperture (NA) of 1.3	62.6 x 62.6 nm
biosr-actinnl-dcv-6	107					DCV	F-actin	502 x 502	1506 x 1506	8	deconvolution	fixed COS-7 cell line	actin filament	mEmerald (GFP)	wide-field microscope	with excitation numerical aperture (NA) of 1.41, detection numerical aperture (NA) of 1.3	62.6 x 62.6 nm	non-linear structured illumination microscope	with excitation numerical aperture (NA) of 1.41, detection numerical aperture (NA) of 1.3	62.6 x 62.6 nm
biosr-actinnl-dcv-7	108					DCV	F-actin	502 x 502	1506 x 1506	8	deconvolution	fixed COS-7 cell line	actin filament	mEmerald (GFP)	wide-field microscope	with excitation numerical aperture (NA) of 1.41, detection numerical aperture (NA) of 1.3	62.6 x 62.6 nm	non-linear structured illumination microscope	with excitation numerical aperture (NA) of 1.41, detection numerical aperture (NA) of 1.3	62.6 x 62.6 nm
biosr-actinnl-dcv-8	109					DCV	F-actin	502 x 502	1506 x 1506	8	deconvolution	fixed COS-7 cell line	actin filament	mEmerald (GFP)	wide-field microscope	with excitation numerical aperture (NA) of 1.41, detection numerical aperture (NA) of 1.3	62.6 x 62.6 nm	non-linear structured illumination microscope	with excitation numerical aperture (NA) of 1.41, detection numerical aperture (NA) of 1.3	62.6 x 62.6 nm
biosr-actinnl-dcv-9	110	28				DCV	F-actin	502 x 502	1506 x 1506	8	deconvolution	fixed COS-7 cell line	actin filament	mEmerald (GFP)	wide-field microscope	with excitation numerical aperture (NA) of 1.41, detection numerical aperture (NA) of 1.3	62.6 x 62.6 nm	non-linear structured illumination microscope	with excitation numerical aperture (NA) of 1.41, detection numerical aperture (NA) of 1.3	62.6 x 62.6 nm
deepbacs-sim-ecoli-dcv	111	29			27	DCV	membrane	1024 x 1024	1024 x 1024	5	deconvolution	live E. coli cell	membrane	FM5-95 (green)	wide-field microscope	with an Olympus 60x 1.42NA Oil immersion objective. Oil refractive index 1.522.	80 x 80 nm	structured illumination microscope	with an Olympus 60x 1.42NA Oil immersion objective. Oil refractive index 1.522.	80 x 80 nm
deepbacs-sim-saureus-dcv	112	30			28	DCV	membrane	1024 x 1024	1024 x 1024	5	deconvolution	live S. aureus cell	membrane	Nile Red (red)	wide-field microscope	with an Olympus 60x 1.42NA Oil immersion objective. Oil refractive index 1.522.	80 x 80 nm	structured illumination microscope	with an Olympus 60x 1.42NA Oil immersion objective. Oil refractive index 1.522.	80 x 80 nm
w2s-c0-dcv-1	113	31				DCV	Mito	512 x 512	1024 x 1024	8	deconvolution	human cell	mitochondria	Alexa Fluor 488 (green)	wide-field microscope	with a Plan Apochromat TIRF 100X, 1.49-NA objective.	100 x 100 nm	structured illumination microscope	with a Plan Apochromat TIRF 100X, 1.49NA objective.	100 x 100 nm
w2s-c0-dcv-2	114					DCV	Mito	512 x 512	1024 x 1024	8	deconvolution	human cell	mitochondria	Alexa Fluor 488 (green)	wide-field microscope	with a Plan Apochromat TIRF 100X, 1.49-NA objective.	100 x 100 nm	structured illumination microscope	with a Plan Apochromat TIRF 100X, 1.49NA objective.	100 x 100 nm
w2s-c0-dcv-3	115					DCV	Mito	512 x 512	1024 x 1024	8	deconvolution	human cell	mitochondria	Alexa Fluor 488 (green)	wide-field microscope	with a Plan Apochromat TIRF 100X, 1.49-NA objective.	100 x 100 nm	structured illumination microscope	with a Plan Apochromat TIRF 100X, 1.49NA objective.	100 x 100 nm
w2s-c0-dcv-4	116					DCV	Mito	512 x 512	1024 x 1024	8	deconvolution	human cell	mitochondria	Alexa Fluor 488 (green)	wide-field microscope	with a Plan Apochromat TIRF 100X, 1.49-NA objective.	100 x 100 nm	structured illumination microscope	with a Plan Apochromat TIRF 100X, 1.49NA objective.	100 x 100 nm
w2s-c0-dcv-5	117					DCV	Mito	512 x 512	1024 x 1024	8	deconvolution	human cell	mitochondria	Alexa Fluor 488 (green)	wide-field microscope	with a Plan Apochromat TIRF 100X, 1.49-NA objective.	100 x 100 nm	structured illumination microscope	with a Plan Apochromat TIRF 100X, 1.49NA objective.	100 x 100 nm
w2s-c0-dcv-6	118					DCV	Mito	512 x 512	1024 x 1024	8	deconvolution	human cell	mitochondria	Alexa Fluor 488 (green)	wide-field microscope	with a Plan Apochromat TIRF 100X, 1.49-NA objective.	100 x 100 nm	structured illumination microscope	with a Plan Apochromat TIRF 100X, 1.49NA objective.	100 x 100 nm
w2s-c0-dcv-7	119	32				DCV	Mito	512 x 512	1024 x 1024	8	deconvolution	human cell	mitochondria	Alexa Fluor 488 (green)	wide-field microscope	with a Plan Apochromat TIRF 100X, 1.49-NA objective.	100 x 100 nm	structured illumination microscope	with a Plan Apochromat TIRF 100X, 1.49NA objective.	100 x 100 nm
w2s-c1-dcv-1	120	33				DCV	lysosome	512 x 512	1024 x 1024	8	deconvolution	human cell	lysosome	Alexa Fluor 561 (yellow)	wide-field microscope	with a Plan Apochromat TIRF 100X, 1.49-NA objective.	100 x 100 nm	structured illumination microscope	with a Plan Apochromat TIRF 100X, 1.49NA objective.	100 x 100 nm
w2s-c1-dcv-2	121					DCV	lysosome	512 x 512	1024 x 1024	8	deconvolution	human cell	lysosome	Alexa Fluor 561 (yellow)	wide-field microscope	with a Plan Apochromat TIRF 100X, 1.49-NA objective.	100 x 100 nm	structured illumination microscope	with a Plan Apochromat TIRF 100X, 1.49NA objective.	100 x 100 nm
w2s-c1-dcv-3	122					DCV	lysosome	512 x 512	1024 x 1024	8	deconvolution	human cell	lysosome	Alexa Fluor 561 (yellow)	wide-field microscope	with a Plan Apochromat TIRF 100X, 1.49-NA objective.	100 x 100 nm	structured illumination microscope	with a Plan Apochromat TIRF 100X, 1.49NA objective.	100 x 100 nm
w2s-c1-dcv-4	123					DCV	lysosome	512 x 512	1024 x 1024	8	deconvolution	human cell	lysosome	Alexa Fluor 561 (yellow)	wide-field microscope	with a Plan Apochromat TIRF 100X, 1.49-NA objective.	100 x 100 nm	structured illumination microscope	with a Plan Apochromat TIRF 100X, 1.49NA objective.	100 x 100 nm
w2s-c1-dcv-5	124					DCV	lysosome	512 x 512	1024 x 1024	8	deconvolution	human cell	lysosome	Alexa Fluor 561 (yellow)	wide-field microscope	with a Plan Apochromat TIRF 100X, 1.49-NA objective.	100 x 100 nm	structured illumination microscope	with a Plan Apochromat TIRF 100X, 1.49NA objective.	100 x 100 nm
w2s-c1-dcv-6	125					DCV	lysosome	512 x 512	1024 x 1024	8	deconvolution	human cell	lysosome	Alexa Fluor 561 (yellow)	wide-field microscope	with a Plan Apochromat TIRF 100X, 1.49-NA objective.	100 x 100 nm	structured illumination microscope	with a Plan Apochromat TIRF 100X, 1.49NA objective.	100 x 100 nm
w2s-c1-dcv-7	126	34				DCV	lysosome	512 x 512	1024 x 1024	8	deconvolution	human cell	lysosome	Alexa Fluor 561 (yellow)	wide-field microscope	with a Plan Apochromat TIRF 100X, 1.49-NA objective.	100 x 100 nm	structured illumination microscope	with a Plan Apochromat TIRF 100X, 1.49NA objective.	100 x 100 nm
w2s-c2-dcv-1	127	35				DCV	F-actin	512 x 512	1024 x 1024	8	deconvolution	human cell	actin filament	Alexa Fluor 640 (red)	wide-field microscope	with a Plan Apochromat TIRF 100X, 1.49-NA objective.	100 x 100 nm	structured illumination microscope	with a Plan Apochromat TIRF 100X, 1.49NA objective.	100 x 100 nm
w2s-c2-dcv-2	128					DCV	F-actin	512 x 512	1024 x 1024	8	deconvolution	human cell	actin filament	Alexa Fluor 640 (red)	wide-field microscope	with a Plan Apochromat TIRF 100X, 1.49-NA objective.	100 x 100 nm	structured illumination microscope	with a Plan Apochromat TIRF 100X, 1.49NA objective.	100 x 100 nm
w2s-c2-dcv-3	129					DCV	F-actin	512 x 512	1024 x 1024	8	deconvolution	human cell	actin filament	Alexa Fluor 640 (red)	wide-field microscope	with a Plan Apochromat TIRF 100X, 1.49-NA objective.	100 x 100 nm	structured illumination microscope	with a Plan Apochromat TIRF 100X, 1.49NA objective.	100 x 100 nm
w2s-c2-dcv-4	130					DCV	F-actin	512 x 512	1024 x 1024	8	deconvolution	human cell	actin filament	Alexa Fluor 640 (red)	wide-field microscope	with a Plan Apochromat TIRF 100X, 1.49-NA objective.	100 x 100 nm	structured illumination microscope	with a Plan Apochromat TIRF 100X, 1.49NA objective.	100 x 100 nm
w2s-c2-dcv-5	131					DCV	F-actin	512 x 512	1024 x 1024	8	deconvolution	human cell	actin filament	Alexa Fluor 640 (red)	wide-field microscope	with a Plan Apochromat TIRF 100X, 1.49-NA objective.	100 x 100 nm	structured illumination microscope	with a Plan Apochromat TIRF 100X, 1.49NA objective.	100 x 100 nm
w2s-c2-dcv-6	132					DCV	F-actin	512 x 512	1024 x 1024	8	deconvolution	human cell	actin filament	Alexa Fluor 640 (red)	wide-field microscope	with a Plan Apochromat TIRF 100X, 1.49-NA objective.	100 x 100 nm	structured illumination microscope	with a Plan Apochromat TIRF 100X, 1.49NA objective.	100 x 100 nm
w2s-c2-dcv-7	133	36				DCV	F-actin	512 x 512	1024 x 1024	8	deconvolution	human cell	actin filament	Alexa Fluor 640 (red)	wide-field microscope	with a Plan Apochromat TIRF 100X, 1.49-NA objective.	100 x 100 nm	structured illumination microscope	with a Plan Apochromat TIRF 100X, 1.49NA objective.	100 x 100 nm
rcan3d-c2s-mt-dcv	134	37				DCV	MT	1023 x 1022	1023 x 1022	6	deconvolution	fixed mouse embryonic fibroblast cells	microtubule	ATTO 647 (red)	confocal microscope	with 100x 1.4 NA objective. Pinhole size is 0.7 arbitrary unit (A.U.).	25 x 25 nm	stimulated emission depletion microscope	with 100x 1.4 NA objective. Pinhole size is 0.7 arbitrary unit (A.U.).	25 x 25 nm
rcan3d-c2s-npc-dcv	135	38				DCV	NPC	1023 x 1023	1023 x 1023	6	deconvolution	fixed mouse embryonic fibroblast cells	nuclear pore complex	Alexa Fluor 594 (red)	confocal microscope	with 100x 1.4 NA objective. Pinhole size is 0.7 arbitrary unit (A.U.).	25 x 25 nm	stimulated emission depletion microscope	with 100x 1.4 NA objective. Pinhole size is 0.7 arbitrary unit (A.U.).	25 x 25 nm
vmsim5-mito-dcv-crop	136					DCV	Mito	464 x 464	928 x 928	8	deconvolution	live U2OS cell	mitochondria	MitoTracker Green (green)	wide-field microscope	with a 60x, 1.45 NA oil-immersion objective.	80 x 80 nm	structured illumination microscope	with a 60x, 1.45 NA oil-immersion objective.	80 x 80 nm
biosr-cpp-dn-1	137	39				DN	CCP	502 x 502	502 x 502	8	denoising	fixed COS-7 cell line	clathrin-coated pits	mEmerald (GFP)	wide-field microscope	with excitation numerical aperture (NA) of 1.41, detection numerical aperture (NA) of 1.3	62.6 x 62.6 nm	wide-field microscope	with excitation numerical aperture (NA) of 1.41, detection numerical aperture (NA) of 1.3	62.6 x 62.6 nm
biosr-cpp-dn-2	138					DN	CCP	502 x 502	502 x 502	8	denoising	fixed COS-7 cell line	clathrin-coated pits	mEmerald (GFP)	wide-field microscope	with excitation numerical aperture (NA) of 1.41, detection numerical aperture (NA) of 1.3	62.6 x 62.6 nm	wide-field microscope	with excitation numerical aperture (NA) of 1.41, detection numerical aperture (NA) of 1.3	62.6 x 62.6 nm
biosr-cpp-dn-3	139					DN	CCP	502 x 502	502 x 502	8	denoising	fixed COS-7 cell line	clathrin-coated pits	mEmerald (GFP)	wide-field microscope	with excitation numerical aperture (NA) of 1.41, detection numerical aperture (NA) of 1.3	62.6 x 62.6 nm	wide-field microscope	with excitation numerical aperture (NA) of 1.41, detection numerical aperture (NA) of 1.3	62.6 x 62.6 nm
biosr-cpp-dn-4	140					DN	CCP	502 x 502	502 x 502	8	denoising	fixed COS-7 cell line	clathrin-coated pits	mEmerald (GFP)	wide-field microscope	with excitation numerical aperture (NA) of 1.41, detection numerical aperture (NA) of 1.3	62.6 x 62.6 nm	wide-field microscope	with excitation numerical aperture (NA) of 1.41, detection numerical aperture (NA) of 1.3	62.6 x 62.6 nm
biosr-cpp-dn-5	141					DN	CCP	502 x 502	502 x 502	8	denoising	fixed COS-7 cell line	clathrin-coated pits	mEmerald (GFP)	wide-field microscope	with excitation numerical aperture (NA) of 1.41, detection numerical aperture (NA) of 1.3	62.6 x 62.6 nm	wide-field microscope	with excitation numerical aperture (NA) of 1.41, detection numerical aperture (NA) of 1.3	62.6 x 62.6 nm
biosr-cpp-dn-6	142					DN	CCP	502 x 502	502 x 502	8	denoising	fixed COS-7 cell line	clathrin-coated pits	mEmerald (GFP)	wide-field microscope	with excitation numerical aperture (NA) of 1.41, detection numerical aperture (NA) of 1.3	62.6 x 62.6 nm	wide-field microscope	with excitation numerical aperture (NA) of 1.41, detection numerical aperture (NA) of 1.3	62.6 x 62.6 nm
biosr-cpp-dn-7	143					DN	CCP	502 x 502	502 x 502	8	denoising	fixed COS-7 cell line	clathrin-coated pits	mEmerald (GFP)	wide-field microscope	with excitation numerical aperture (NA) of 1.41, detection numerical aperture (NA) of 1.3	62.6 x 62.6 nm	wide-field microscope	with excitation numerical aperture (NA) of 1.41, detection numerical aperture (NA) of 1.3	62.6 x 62.6 nm
biosr-cpp-dn-8	144					DN	CCP	502 x 502	502 x 502	8	denoising	fixed COS-7 cell line	clathrin-coated pits	mEmerald (GFP)	wide-field microscope	with excitation numerical aperture (NA) of 1.41, detection numerical aperture (NA) of 1.3	62.6 x 62.6 nm	wide-field microscope	with excitation numerical aperture (NA) of 1.41, detection numerical aperture (NA) of 1.3	62.6 x 62.6 nm
biosr-er-dn-1	145	40				DN	ER	502 x 502	502 x 502	8	denoising	fixed COS-7 cell line	endoplasmic reticulum	mEmerald (GFP)	wide-field microscope	with excitation numerical aperture (NA) of 1.35, detection numerical aperture (NA) of 1.3	62.6 x 62.6 nm	wide-field microscope	with excitation numerical aperture (NA) of 1.35, detection numerical aperture (NA) of 1.3	62.6 x 62.6 nm
biosr-er-dn-2	146					DN	ER	502 x 502	502 x 502	8	denoising	fixed COS-7 cell line	endoplasmic reticulum	mEmerald (GFP)	wide-field microscope	with excitation numerical aperture (NA) of 1.35, detection numerical aperture (NA) of 1.3	62.6 x 62.6 nm	wide-field microscope	with excitation numerical aperture (NA) of 1.35, detection numerical aperture (NA) of 1.3	62.6 x 62.6 nm
biosr-er-dn-3	147					DN	ER	502 x 502	502 x 502	8	denoising	fixed COS-7 cell line	endoplasmic reticulum	mEmerald (GFP)	wide-field microscope	with excitation numerical aperture (NA) of 1.35, detection numerical aperture (NA) of 1.3	62.6 x 62.6 nm	wide-field microscope	with excitation numerical aperture (NA) of 1.35, detection numerical aperture (NA) of 1.3	62.6 x 62.6 nm
biosr-er-dn-4	148					DN	ER	502 x 502	502 x 502	8	denoising	fixed COS-7 cell line	endoplasmic reticulum	mEmerald (GFP)	wide-field microscope	with excitation numerical aperture (NA) of 1.35, detection numerical aperture (NA) of 1.3	62.6 x 62.6 nm	wide-field microscope	with excitation numerical aperture (NA) of 1.35, detection numerical aperture (NA) of 1.3	62.6 x 62.6 nm
biosr-er-dn-5	149					DN	ER	502 x 502	502 x 502	8	denoising	fixed COS-7 cell line	endoplasmic reticulum	mEmerald (GFP)	wide-field microscope	with excitation numerical aperture (NA) of 1.35, detection numerical aperture (NA) of 1.3	62.6 x 62.6 nm	wide-field microscope	with excitation numerical aperture (NA) of 1.35, detection numerical aperture (NA) of 1.3	62.6 x 62.6 nm
biosr-actin-dn-1	150	42				DN	F-actin	502 x 502	502 x 502	8	denoising	fixed COS-7 cell line	actin filament	mEmerald (GFP)	wide-field microscope	with excitation numerical aperture (NA) of 1.41, detection numerical aperture (NA) of 1.3	62.6 x 62.6 nm	wide-field microscope	with excitation numerical aperture (NA) of 1.41, detection numerical aperture (NA) of 1.3	62.6 x 62.6 nm
biosr-actin-dn-2	151					DN	F-actin	502 x 502	502 x 502	8	denoising	fixed COS-7 cell line	actin filament	mEmerald (GFP)	wide-field microscope	with excitation numerical aperture (NA) of 1.41, detection numerical aperture (NA) of 1.3	62.6 x 62.6 nm	wide-field microscope	with excitation numerical aperture (NA) of 1.41, detection numerical aperture (NA) of 1.3	62.6 x 62.6 nm
biosr-actin-dn-3	152					DN	F-actin	502 x 502	502 x 502	8	denoising	fixed COS-7 cell line	actin filament	mEmerald (GFP)	wide-field microscope	with excitation numerical aperture (NA) of 1.41, detection numerical aperture (NA) of 1.3	62.6 x 62.6 nm	wide-field microscope	with excitation numerical aperture (NA) of 1.41, detection numerical aperture (NA) of 1.3	62.6 x 62.6 nm
biosr-actin-dn-4	153					DN	F-actin	502 x 502	502 x 502	8	denoising	fixed COS-7 cell line	actin filament	mEmerald (GFP)	wide-field microscope	with excitation numerical aperture (NA) of 1.41, detection numerical aperture (NA) of 1.3	62.6 x 62.6 nm	wide-field microscope	with excitation numerical aperture (NA) of 1.41, detection numerical aperture (NA) of 1.3	62.6 x 62.6 nm
biosr-actin-dn-5	154					DN	F-actin	502 x 502	502 x 502	8	denoising	fixed COS-7 cell line	actin filament	mEmerald (GFP)	wide-field microscope	with excitation numerical aperture (NA) of 1.41, detection numerical aperture (NA) of 1.3	62.6 x 62.6 nm	wide-field microscope	with excitation numerical aperture (NA) of 1.41, detection numerical aperture (NA) of 1.3	62.6 x 62.6 nm
biosr-actin-dn-6	155					DN	F-actin	502 x 502	502 x 502	8	denoising	fixed COS-7 cell line	actin filament	mEmerald (GFP)	wide-field microscope	with excitation numerical aperture (NA) of 1.41, detection numerical aperture (NA) of 1.3	62.6 x 62.6 nm	wide-field microscope	with excitation numerical aperture (NA) of 1.41, detection numerical aperture (NA) of 1.3	62.6 x 62.6 nm
biosr-actin-dn-7	156					DN	F-actin	502 x 502	502 x 502	8	denoising	fixed COS-7 cell line	actin filament	mEmerald (GFP)	wide-field microscope	with excitation numerical aperture (NA) of 1.41, detection numerical aperture (NA) of 1.3	62.6 x 62.6 nm	wide-field microscope	with excitation numerical aperture (NA) of 1.41, detection numerical aperture (NA) of 1.3	62.6 x 62.6 nm
biosr-actin-dn-8	157					DN	F-actin	502 x 502	502 x 502	8	denoising	fixed COS-7 cell line	actin filament	mEmerald (GFP)	wide-field microscope	with excitation numerical aperture (NA) of 1.41, detection numerical aperture (NA) of 1.3	62.6 x 62.6 nm	wide-field microscope	with excitation numerical aperture (NA) of 1.41, detection numerical aperture (NA) of 1.3	62.6 x 62.6 nm
biosr-actin-dn-9	158					DN	F-actin	502 x 502	502 x 502	8	denoising	fixed COS-7 cell line	actin filament	mEmerald (GFP)	wide-field microscope	with excitation numerical aperture (NA) of 1.41, detection numerical aperture (NA) of 1.3	62.6 x 62.6 nm	wide-field microscope	with excitation numerical aperture (NA) of 1.41, detection numerical aperture (NA) of 1.3	62.6 x 62.6 nm
biosr-actin-dn-10	159					DN	F-actin	502 x 502	502 x 502	8	denoising	fixed COS-7 cell line	actin filament	mEmerald (GFP)	wide-field microscope	with excitation numerical aperture (NA) of 1.41, detection numerical aperture (NA) of 1.3	62.6 x 62.6 nm	wide-field microscope	with excitation numerical aperture (NA) of 1.41, detection numerical aperture (NA) of 1.3	62.6 x 62.6 nm
biosr-actin-dn-11	160					DN	F-actin	502 x 502	502 x 502	8	denoising	fixed COS-7 cell line	actin filament	mEmerald (GFP)	wide-field microscope	with excitation numerical aperture (NA) of 1.41, detection numerical aperture (NA) of 1.3	62.6 x 62.6 nm	wide-field microscope	with excitation numerical aperture (NA) of 1.41, detection numerical aperture (NA) of 1.3	62.6 x 62.6 nm
biosr-mt-dn-1	161	41				DN	MT	502 x 502	502 x 502	8	denoising	fixed COS-7 cell line	microtubule	mEmerald (GFP)	wide-field microscope	with excitation numerical aperture (NA) of 1.35, detection numerical aperture (NA) of 1.3	62.6 x 62.6 nm	wide-field microscope	with excitation numerical aperture (NA) of 1.35, detection numerical aperture (NA) of 1.3	62.6 x 62.6 nm
biosr-mt-dn-2	162					DN	MT	502 x 502	502 x 502	8	denoising	fixed COS-7 cell line	microtubule	mEmerald (GFP)	wide-field microscope	with excitation numerical aperture (NA) of 1.35, detection numerical aperture (NA) of 1.3	62.6 x 62.6 nm	wide-field microscope	with excitation numerical aperture (NA) of 1.35, detection numerical aperture (NA) of 1.3	62.6 x 62.6 nm
biosr-mt-dn-3	163					DN	MT	502 x 502	502 x 502	8	denoising	fixed COS-7 cell line	microtubule	mEmerald (GFP)	wide-field microscope	with excitation numerical aperture (NA) of 1.35, detection numerical aperture (NA) of 1.3	62.6 x 62.6 nm	wide-field microscope	with excitation numerical aperture (NA) of 1.35, detection numerical aperture (NA) of 1.3	62.6 x 62.6 nm
biosr-mt-dn-4	164					DN	MT	502 x 502	502 x 502	8	denoising	fixed COS-7 cell line	microtubule	mEmerald (GFP)	wide-field microscope	with excitation numerical aperture (NA) of 1.35, detection numerical aperture (NA) of 1.3	62.6 x 62.6 nm	wide-field microscope	with excitation numerical aperture (NA) of 1.35, detection numerical aperture (NA) of 1.3	62.6 x 62.6 nm
biosr-mt-dn-5	165					DN	MT	502 x 502	502 x 502	8	denoising	fixed COS-7 cell line	microtubule	mEmerald (GFP)	wide-field microscope	with excitation numerical aperture (NA) of 1.35, detection numerical aperture (NA) of 1.3	62.6 x 62.6 nm	wide-field microscope	with excitation numerical aperture (NA) of 1.35, detection numerical aperture (NA) of 1.3	62.6 x 62.6 nm
biosr-mt-dn-6	166					DN	MT	502 x 502	502 x 502	8	denoising	fixed COS-7 cell line	microtubule	mEmerald (GFP)	wide-field microscope	with excitation numerical aperture (NA) of 1.35, detection numerical aperture (NA) of 1.3	62.6 x 62.6 nm	wide-field microscope	with excitation numerical aperture (NA) of 1.35, detection numerical aperture (NA) of 1.3	62.6 x 62.6 nm
biosr-mt-dn-7	167					DN	MT	502 x 502	502 x 502	8	denoising	fixed COS-7 cell line	microtubule	mEmerald (GFP)	wide-field microscope	with excitation numerical aperture (NA) of 1.35, detection numerical aperture (NA) of 1.3	62.6 x 62.6 nm	wide-field microscope	with excitation numerical aperture (NA) of 1.35, detection numerical aperture (NA) of 1.3	62.6 x 62.6 nm
biosr-mt-dn-8	168					DN	MT	502 x 502	502 x 502	8	denoising	fixed COS-7 cell line	microtubule	mEmerald (GFP)	wide-field microscope	with excitation numerical aperture (NA) of 1.35, detection numerical aperture (NA) of 1.3	62.6 x 62.6 nm	wide-field microscope	with excitation numerical aperture (NA) of 1.35, detection numerical aperture (NA) of 1.3	62.6 x 62.6 nm
biosr-actinnl-dn-1	169	43				DN	F-actin	502 x 502	502 x 502	8	denoising	fixed COS-7 cell line	actin filament	mEmerald (GFP)	wide-field microscope	with excitation numerical aperture (NA) of 1.41, detection numerical aperture (NA) of 1.3	62.6 x 62.6 nm	wide-field microscope	with excitation numerical aperture (NA) of 1.41, detection numerical aperture (NA) of 1.3	62.6 x 62.6 nm
biosr-actinnl-dn-2	170					DN	F-actin	502 x 502	502 x 502	8	denoising	fixed COS-7 cell line	actin filament	mEmerald (GFP)	wide-field microscope	with excitation numerical aperture (NA) of 1.41, detection numerical aperture (NA) of 1.3	62.6 x 62.6 nm	wide-field microscope	with excitation numerical aperture (NA) of 1.41, detection numerical aperture (NA) of 1.3	62.6 x 62.6 nm
biosr-actinnl-dn-3	171					DN	F-actin	502 x 502	502 x 502	8	denoising	fixed COS-7 cell line	actin filament	mEmerald (GFP)	wide-field microscope	with excitation numerical aperture (NA) of 1.41, detection numerical aperture (NA) of 1.3	62.6 x 62.6 nm	wide-field microscope	with excitation numerical aperture (NA) of 1.41, detection numerical aperture (NA) of 1.3	62.6 x 62.6 nm
biosr-actinnl-dn-4	172					DN	F-actin	502 x 502	502 x 502	8	denoising	fixed COS-7 cell line	actin filament	mEmerald (GFP)	wide-field microscope	with excitation numerical aperture (NA) of 1.41, detection numerical aperture (NA) of 1.3	62.6 x 62.6 nm	wide-field microscope	with excitation numerical aperture (NA) of 1.41, detection numerical aperture (NA) of 1.3	62.6 x 62.6 nm
biosr-actinnl-dn-5	173					DN	F-actin	502 x 502	502 x 502	8	denoising	fixed COS-7 cell line	actin filament	mEmerald (GFP)	wide-field microscope	with excitation numerical aperture (NA) of 1.41, detection numerical aperture (NA) of 1.3	62.6 x 62.6 nm	wide-field microscope	with excitation numerical aperture (NA) of 1.41, detection numerical aperture (NA) of 1.3	62.6 x 62.6 nm
biosr-actinnl-dn-6	174					DN	F-actin	502 x 502	502 x 502	8	denoising	fixed COS-7 cell line	actin filament	mEmerald (GFP)	wide-field microscope	with excitation numerical aperture (NA) of 1.41, detection numerical aperture (NA) of 1.3	62.6 x 62.6 nm	wide-field microscope	with excitation numerical aperture (NA) of 1.41, detection numerical aperture (NA) of 1.3	62.6 x 62.6 nm
biosr-actinnl-dn-7	175					DN	F-actin	502 x 502	502 x 502	8	denoising	fixed COS-7 cell line	actin filament	mEmerald (GFP)	wide-field microscope	with excitation numerical aperture (NA) of 1.41, detection numerical aperture (NA) of 1.3	62.6 x 62.6 nm	wide-field microscope	with excitation numerical aperture (NA) of 1.41, detection numerical aperture (NA) of 1.3	62.6 x 62.6 nm
biosr-actinnl-dn-8	176					DN	F-actin	502 x 502	502 x 502	8	denoising	fixed COS-7 cell line	actin filament	mEmerald (GFP)	wide-field microscope	with excitation numerical aperture (NA) of 1.41, detection numerical aperture (NA) of 1.3	62.6 x 62.6 nm	wide-field microscope	with excitation numerical aperture (NA) of 1.41, detection numerical aperture (NA) of 1.3	62.6 x 62.6 nm
biosr+-ccp-dn-1	177	44				DN	CCP	512 x 256	512 x 256	8	denoising	fixed COS-7 cell line	clathrin-coated pits	mEmerald (GFP)	wide-field microscope	with excitation numerical aperture (NA) of 1.41, detection numerical aperture (NA) of 1.35	62.6 x 62.6 nm	wide-field microscope	with excitation numerical aperture (NA) of 1.41, detection numerical aperture (NA) of 1.35	62.6 x 62.6 nm
biosr+-ccp-dn-2	178					DN	CCP	512 x 256	512 x 256	8	denoising	fixed COS-7 cell line	clathrin-coated pits	mEmerald (GFP)	wide-field microscope	with excitation numerical aperture (NA) of 1.41, detection numerical aperture (NA) of 1.35	62.6 x 62.6 nm	wide-field microscope	with excitation numerical aperture (NA) of 1.41, detection numerical aperture (NA) of 1.35	62.6 x 62.6 nm
biosr+-ccp-dn-3	179					DN	CCP	512 x 256	512 x 256	8	denoising	fixed COS-7 cell line	clathrin-coated pits	mEmerald (GFP)	wide-field microscope	with excitation numerical aperture (NA) of 1.41, detection numerical aperture (NA) of 1.35	62.6 x 62.6 nm	wide-field microscope	with excitation numerical aperture (NA) of 1.41, detection numerical aperture (NA) of 1.35	62.6 x 62.6 nm
biosr+-ccp-dn-4	180					DN	CCP	512 x 256	512 x 256	8	denoising	fixed COS-7 cell line	clathrin-coated pits	mEmerald (GFP)	wide-field microscope	with excitation numerical aperture (NA) of 1.41, detection numerical aperture (NA) of 1.35	62.6 x 62.6 nm	wide-field microscope	with excitation numerical aperture (NA) of 1.41, detection numerical aperture (NA) of 1.35	62.6 x 62.6 nm
biosr+-ccp-dn-5	181					DN	CCP	512 x 256	512 x 256	8	denoising	fixed COS-7 cell line	clathrin-coated pits	mEmerald (GFP)	wide-field microscope	with excitation numerical aperture (NA) of 1.41, detection numerical aperture (NA) of 1.35	62.6 x 62.6 nm	wide-field microscope	with excitation numerical aperture (NA) of 1.41, detection numerical aperture (NA) of 1.35	62.6 x 62.6 nm
biosr+-ccp-dn-6	182					DN	CCP	512 x 256	512 x 256	8	denoising	fixed COS-7 cell line	clathrin-coated pits	mEmerald (GFP)	wide-field microscope	with excitation numerical aperture (NA) of 1.41, detection numerical aperture (NA) of 1.35	62.6 x 62.6 nm	wide-field microscope	with excitation numerical aperture (NA) of 1.41, detection numerical aperture (NA) of 1.35	62.6 x 62.6 nm
biosr+-ccp-dn-7	183					DN	CCP	512 x 256	512 x 256	8	denoising	fixed COS-7 cell line	clathrin-coated pits	mEmerald (GFP)	wide-field microscope	with excitation numerical aperture (NA) of 1.41, detection numerical aperture (NA) of 1.35	62.6 x 62.6 nm	wide-field microscope	with excitation numerical aperture (NA) of 1.41, detection numerical aperture (NA) of 1.35	62.6 x 62.6 nm
biosr+-ccp-dn-8	184	45				DN	CCP	512 x 256	512 x 256	8	denoising	fixed COS-7 cell line	clathrin-coated pits	mEmerald (GFP)	wide-field microscope	with excitation numerical aperture (NA) of 1.41, detection numerical aperture (NA) of 1.35	62.6 x 62.6 nm	wide-field microscope	with excitation numerical aperture (NA) of 1.41, detection numerical aperture (NA) of 1.35	62.6 x 62.6 nm
biosr+-er-dn-1	185	46				DN	ER	512 x 512	512 x 512	8	denoising	fixed COS-7 cell line	endoplasmic reticulum	mEmerald (GFP)	wide-field microscope	with excitation numerical aperture (NA) of 1.35, detection numerical aperture (NA) of 1.35	62.6 x 62.6 nm	wide-field microscope	with excitation numerical aperture (NA) of 1.35, detection numerical aperture (NA) of 1.35	62.6 x 62.6 nm
biosr+-er-dn-2	186					DN	ER	512 x 512	512 x 512	8	denoising	fixed COS-7 cell line	endoplasmic reticulum	mEmerald (GFP)	wide-field microscope	with excitation numerical aperture (NA) of 1.35, detection numerical aperture (NA) of 1.35	62.6 x 62.6 nm	wide-field microscope	with excitation numerical aperture (NA) of 1.35, detection numerical aperture (NA) of 1.35	62.6 x 62.6 nm
biosr+-er-dn-3	187					DN	ER	512 x 512	512 x 512	8	denoising	fixed COS-7 cell line	endoplasmic reticulum	mEmerald (GFP)	wide-field microscope	with excitation numerical aperture (NA) of 1.35, detection numerical aperture (NA) of 1.35	62.6 x 62.6 nm	wide-field microscope	with excitation numerical aperture (NA) of 1.35, detection numerical aperture (NA) of 1.35	62.6 x 62.6 nm
biosr+-er-dn-4	188					DN	ER	512 x 512	512 x 512	8	denoising	fixed COS-7 cell line	endoplasmic reticulum	mEmerald (GFP)	wide-field microscope	with excitation numerical aperture (NA) of 1.35, detection numerical aperture (NA) of 1.35	62.6 x 62.6 nm	wide-field microscope	with excitation numerical aperture (NA) of 1.35, detection numerical aperture (NA) of 1.35	62.6 x 62.6 nm
biosr+-er-dn-5	189					DN	ER	512 x 512	512 x 512	8	denoising	fixed COS-7 cell line	endoplasmic reticulum	mEmerald (GFP)	wide-field microscope	with excitation numerical aperture (NA) of 1.35, detection numerical aperture (NA) of 1.35	62.6 x 62.6 nm	wide-field microscope	with excitation numerical aperture (NA) of 1.35, detection numerical aperture (NA) of 1.35	62.6 x 62.6 nm
biosr+-er-dn-6	190	47				DN	ER	512 x 512	512 x 512	8	denoising	fixed COS-7 cell line	endoplasmic reticulum	mEmerald (GFP)	wide-field microscope	with excitation numerical aperture (NA) of 1.35, detection numerical aperture (NA) of 1.35	62.6 x 62.6 nm	wide-field microscope	with excitation numerical aperture (NA) of 1.35, detection numerical aperture (NA) of 1.35	62.6 x 62.6 nm
biosr+-actin-dn-1	191	48				DN	F-actin	512 x 512	512 x 512	8	denoising	fixed COS-7 cell line	actin filament	mEmerald (GFP)	wide-field microscope	with excitation numerical aperture (NA) of 1.41, detection numerical aperture (NA) of 1.35	62.6 x 62.6 nm	wide-field microscope	with excitation numerical aperture (NA) of 1.41, detection numerical aperture (NA) of 1.35	62.6 x 62.6 nm
biosr+-actin-dn-2	192					DN	F-actin	512 x 512	512 x 512	8	denoising	fixed COS-7 cell line	actin filament	mEmerald (GFP)	wide-field microscope	with excitation numerical aperture (NA) of 1.41, detection numerical aperture (NA) of 1.35	62.6 x 62.6 nm	wide-field microscope	with excitation numerical aperture (NA) of 1.41, detection numerical aperture (NA) of 1.35	62.6 x 62.6 nm
biosr+-actin-dn-3	193					DN	F-actin	512 x 512	512 x 512	8	denoising	fixed COS-7 cell line	actin filament	mEmerald (GFP)	wide-field microscope	with excitation numerical aperture (NA) of 1.41, detection numerical aperture (NA) of 1.35	62.6 x 62.6 nm	wide-field microscope	with excitation numerical aperture (NA) of 1.41, detection numerical aperture (NA) of 1.35	62.6 x 62.6 nm
biosr+-actin-dn-4	194					DN	F-actin	512 x 512	512 x 512	8	denoising	fixed COS-7 cell line	actin filament	mEmerald (GFP)	wide-field microscope	with excitation numerical aperture (NA) of 1.41, detection numerical aperture (NA) of 1.35	62.6 x 62.6 nm	wide-field microscope	with excitation numerical aperture (NA) of 1.41, detection numerical aperture (NA) of 1.35	62.6 x 62.6 nm
biosr+-actin-dn-5	195					DN	F-actin	512 x 512	512 x 512	8	denoising	fixed COS-7 cell line	actin filament	mEmerald (GFP)	wide-field microscope	with excitation numerical aperture (NA) of 1.41, detection numerical aperture (NA) of 1.35	62.6 x 62.6 nm	wide-field microscope	with excitation numerical aperture (NA) of 1.41, detection numerical aperture (NA) of 1.35	62.6 x 62.6 nm
biosr+-actin-dn-6	196					DN	F-actin	512 x 512	512 x 512	8	denoising	fixed COS-7 cell line	actin filament	mEmerald (GFP)	wide-field microscope	with excitation numerical aperture (NA) of 1.41, detection numerical aperture (NA) of 1.35	62.6 x 62.6 nm	wide-field microscope	with excitation numerical aperture (NA) of 1.41, detection numerical aperture (NA) of 1.35	62.6 x 62.6 nm
biosr+-actin-dn-7	197					DN	F-actin	512 x 512	512 x 512	8	denoising	fixed COS-7 cell line	actin filament	mEmerald (GFP)	wide-field microscope	with excitation numerical aperture (NA) of 1.41, detection numerical aperture (NA) of 1.35	62.6 x 62.6 nm	wide-field microscope	with excitation numerical aperture (NA) of 1.41, detection numerical aperture (NA) of 1.35	62.6 x 62.6 nm
biosr+-actin-dn-8	198					DN	F-actin	512 x 512	512 x 512	8	denoising	fixed COS-7 cell line	actin filament	mEmerald (GFP)	wide-field microscope	with excitation numerical aperture (NA) of 1.41, detection numerical aperture (NA) of 1.35	62.6 x 62.6 nm	wide-field microscope	with excitation numerical aperture (NA) of 1.41, detection numerical aperture (NA) of 1.35	62.6 x 62.6 nm
biosr+-actin-dn-9	199					DN	F-actin	512 x 512	512 x 512	8	denoising	fixed COS-7 cell line	actin filament	mEmerald (GFP)	wide-field microscope	with excitation numerical aperture (NA) of 1.41, detection numerical aperture (NA) of 1.35	62.6 x 62.6 nm	wide-field microscope	with excitation numerical aperture (NA) of 1.41, detection numerical aperture (NA) of 1.35	62.6 x 62.6 nm
biosr+-actin-dn-10	200					DN	F-actin	512 x 512	512 x 512	8	denoising	fixed COS-7 cell line	actin filament	mEmerald (GFP)	wide-field microscope	with excitation numerical aperture (NA) of 1.41, detection numerical aperture (NA) of 1.35	62.6 x 62.6 nm	wide-field microscope	with excitation numerical aperture (NA) of 1.41, detection numerical aperture (NA) of 1.35	62.6 x 62.6 nm
biosr+-actin-dn-11	201	49				DN	F-actin	512 x 512	512 x 512	8	denoising	fixed COS-7 cell line	actin filament	mEmerald (GFP)	wide-field microscope	with excitation numerical aperture (NA) of 1.41, detection numerical aperture (NA) of 1.35	62.6 x 62.6 nm	wide-field microscope	with excitation numerical aperture (NA) of 1.41, detection numerical aperture (NA) of 1.35	62.6 x 62.6 nm
biosr+-mt-dn-1	202	50				DN	MT	512 x 512	512 x 512	8	denoising	fixed COS-7 cell line	microtubule	mEmerald (GFP)	wide-field microscope	with excitation numerical aperture (NA) of 1.35, detection numerical aperture (NA) of 1.35	62.6 x 62.6 nm	wide-field microscope	with excitation numerical aperture (NA) of 1.35, detection numerical aperture (NA) of 1.35	62.6 x 62.6 nm
biosr+-mt-dn-2	203					DN	MT	512 x 512	512 x 512	8	denoising	fixed COS-7 cell line	microtubule	mEmerald (GFP)	wide-field microscope	with excitation numerical aperture (NA) of 1.35, detection numerical aperture (NA) of 1.35	62.6 x 62.6 nm	wide-field microscope	with excitation numerical aperture (NA) of 1.35, detection numerical aperture (NA) of 1.35	62.6 x 62.6 nm
biosr+-mt-dn-3	204					DN	MT	512 x 512	512 x 512	8	denoising	fixed COS-7 cell line	microtubule	mEmerald (GFP)	wide-field microscope	with excitation numerical aperture (NA) of 1.35, detection numerical aperture (NA) of 1.35	62.6 x 62.6 nm	wide-field microscope	with excitation numerical aperture (NA) of 1.35, detection numerical aperture (NA) of 1.35	62.6 x 62.6 nm
biosr+-mt-dn-4	205					DN	MT	512 x 512	512 x 512	8	denoising	fixed COS-7 cell line	microtubule	mEmerald (GFP)	wide-field microscope	with excitation numerical aperture (NA) of 1.35, detection numerical aperture (NA) of 1.35	62.6 x 62.6 nm	wide-field microscope	with excitation numerical aperture (NA) of 1.35, detection numerical aperture (NA) of 1.35	62.6 x 62.6 nm
biosr+-mt-dn-5	206					DN	MT	512 x 512	512 x 512	8	denoising	fixed COS-7 cell line	microtubule	mEmerald (GFP)	wide-field microscope	with excitation numerical aperture (NA) of 1.35, detection numerical aperture (NA) of 1.35	62.6 x 62.6 nm	wide-field microscope	with excitation numerical aperture (NA) of 1.35, detection numerical aperture (NA) of 1.35	62.6 x 62.6 nm
biosr+-mt-dn-6	207					DN	MT	512 x 512	512 x 512	8	denoising	fixed COS-7 cell line	microtubule	mEmerald (GFP)	wide-field microscope	with excitation numerical aperture (NA) of 1.35, detection numerical aperture (NA) of 1.35	62.6 x 62.6 nm	wide-field microscope	with excitation numerical aperture (NA) of 1.35, detection numerical aperture (NA) of 1.35	62.6 x 62.6 nm
biosr+-mt-dn-7	208					DN	MT	512 x 512	512 x 512	8	denoising	fixed COS-7 cell line	microtubule	mEmerald (GFP)	wide-field microscope	with excitation numerical aperture (NA) of 1.35, detection numerical aperture (NA) of 1.35	62.6 x 62.6 nm	wide-field microscope	with excitation numerical aperture (NA) of 1.35, detection numerical aperture (NA) of 1.35	62.6 x 62.6 nm
biosr+-mt-dn-8	209	51				DN	MT	512 x 512	512 x 512	8	denoising	fixed COS-7 cell line	microtubule	mEmerald (GFP)	wide-field microscope	with excitation numerical aperture (NA) of 1.35, detection numerical aperture (NA) of 1.35	62.6 x 62.6 nm	wide-field microscope	with excitation numerical aperture (NA) of 1.35, detection numerical aperture (NA) of 1.35	62.6 x 62.6 nm
biosr+-myosin-dn-1	210	52				DN	Myosin-IIA	512 x 512	512 x 512	8	denoising	U2OS cell line	Myosin-IIA	JF549 (red)	wide-field microscope	with excitation numerical aperture (NA) of 1.41, effective detection numerical aperture (NA) of 1.35	62.6 x 62.6 nm	wide-field microscope	with excitation numerical aperture (NA) of 1.41, effective detection numerical aperture (NA) of 1.35	62.6 x 62.6 nm
biosr+-myosin-dn-2	211					DN	Myosin-IIA	512 x 512	512 x 512	8	denoising	U2OS cell line	Myosin-IIA	JF549 (red)	wide-field microscope	with excitation numerical aperture (NA) of 1.41, effective detection numerical aperture (NA) of 1.35	62.6 x 62.6 nm	wide-field microscope	with excitation numerical aperture (NA) of 1.41, effective detection numerical aperture (NA) of 1.35	62.6 x 62.6 nm
biosr+-myosin-dn-3	212					DN	Myosin-IIA	512 x 512	512 x 512	8	denoising	U2OS cell line	Myosin-IIA	JF549 (red)	wide-field microscope	with excitation numerical aperture (NA) of 1.41, effective detection numerical aperture (NA) of 1.35	62.6 x 62.6 nm	wide-field microscope	with excitation numerical aperture (NA) of 1.41, effective detection numerical aperture (NA) of 1.35	62.6 x 62.6 nm
biosr+-myosin-dn-4	213					DN	Myosin-IIA	512 x 512	512 x 512	8	denoising	U2OS cell line	Myosin-IIA	JF549 (red)	wide-field microscope	with excitation numerical aperture (NA) of 1.41, effective detection numerical aperture (NA) of 1.35	62.6 x 62.6 nm	wide-field microscope	with excitation numerical aperture (NA) of 1.41, effective detection numerical aperture (NA) of 1.35	62.6 x 62.6 nm
biosr+-myosin-dn-5	214					DN	Myosin-IIA	512 x 512	512 x 512	8	denoising	U2OS cell line	Myosin-IIA	JF549 (red)	wide-field microscope	with excitation numerical aperture (NA) of 1.41, effective detection numerical aperture (NA) of 1.35	62.6 x 62.6 nm	wide-field microscope	with excitation numerical aperture (NA) of 1.41, effective detection numerical aperture (NA) of 1.35	62.6 x 62.6 nm
biosr+-myosin-dn-6	215					DN	Myosin-IIA	512 x 512	512 x 512	8	denoising	U2OS cell line	Myosin-IIA	JF549 (red)	wide-field microscope	with excitation numerical aperture (NA) of 1.41, effective detection numerical aperture (NA) of 1.35	62.6 x 62.6 nm	wide-field microscope	with excitation numerical aperture (NA) of 1.41, effective detection numerical aperture (NA) of 1.35	62.6 x 62.6 nm
biosr+-myosin-dn-7	216					DN	Myosin-IIA	512 x 512	512 x 512	8	denoising	U2OS cell line	Myosin-IIA	JF549 (red)	wide-field microscope	with excitation numerical aperture (NA) of 1.41, effective detection numerical aperture (NA) of 1.35	62.6 x 62.6 nm	wide-field microscope	with excitation numerical aperture (NA) of 1.41, effective detection numerical aperture (NA) of 1.35	62.6 x 62.6 nm
biosr+-myosin-dn-8	217	53				DN	Myosin-IIA	512 x 512	512 x 512	8	denoising	U2OS cell line	Myosin-IIA	JF549 (red)	wide-field microscope	with excitation numerical aperture (NA) of 1.41, effective detection numerical aperture (NA) of 1.35	62.6 x 62.6 nm	wide-field microscope	with excitation numerical aperture (NA) of 1.41, effective detection numerical aperture (NA) of 1.35	62.6 x 62.6 nm
care-planaria-dn-1	218	54			18	DN	nuclei	1024 x 1024	1024 x 1024	8	denoising	Planaria (S. mediterranea)	nuclei	RedDot1 (red)	spinning disc confocal microscope	with a 30x/1.05-NA (numerical aperture) silicon oil-immersion objective.	400 x 400 nm	spinning disc confocal microscope	with a 30x/1.05-NA (numerical aperture) silicon oil-immersion objective.	400 x 400 nm
care-planaria-dn-2	219				19	DN	nuclei	1024 x 1024	1024 x 1024	8	denoising	Planaria (S. mediterranea)	nuclei	RedDot1 (red)	spinning disc confocal microscope	with a 30x/1.05-NA (numerical aperture) silicon oil-immersion objective.	400 x 400 nm	spinning disc confocal microscope	with a 30x/1.05-NA (numerical aperture) silicon oil-immersion objective.	400 x 400 nm
care-planaria-dn-3	220	55				DN	nuclei	1024 x 1024	1024 x 1024	8	denoising	Planaria (S. mediterranea)	nuclei	RedDot1 (red)	spinning disc confocal microscope	with a 30x/1.05-NA (numerical aperture) silicon oil-immersion objective.	400 x 400 nm	spinning disc confocal microscope	with a 30x/1.05-NA (numerical aperture) silicon oil-immersion objective.	400 x 400 nm
care-tribolium-dn-1	221	56			20	DN	nuclei	626 x 1015	626 x 1015	8	denoising	red flour beetle (Tribolium castaneum) embryo	nuclei	nGFP (GFP)	multiphoton laser-scanning microscope	with a 25x multi-immersion objective. The embryos were imaged either under oil or water.	500 x 500 nm	multiphoton laser-scanning microscope	with a 25x multi-immersion objective. The embryos were imaged either under oil or water.	500 x 500 nm
care-tribolium-dn-2	222				21	DN	nuclei	626 x 1015	626 x 1015	8	denoising	red flour beetle (Tribolium castaneum) embryo	nuclei	nGFP (GFP)	multiphoton laser-scanning microscope	with a 25x multi-immersion objective. The embryos were imaged either under oil or water.	500 x 500 nm	multiphoton laser-scanning microscope	with a 25x multi-immersion objective. The embryos were imaged either under oil or water.	500 x 500 nm
care-tribolium-dn-3	223	57			22	DN	nuclei	626 x 1015	626 x 1015	8	denoising	red flour beetle (Tribolium castaneum) embryo	nuclei	nGFP (GFP)	multiphoton laser-scanning microscope	with a 25x multi-immersion objective. The embryos were imaged either under oil or water.	500 x 500 nm	multiphoton laser-scanning microscope	with a 25x multi-immersion objective. The embryos were imaged either under oil or water.	500 x 500 nm
deepbacs-ecoli-dn	224	58			26	DN	nucleoid	512 x 512	512 x 512	2	denoising	H-NS-mScarlet-I expressing E. coli (Escherichia coli) cell	nucleoid	mScarlet-I (RFP)	confocal microscope	with a 1.40 NA 63x oil immersion objective. the pinhole size was set to 0.5 airy units.	45 x 45 nm	confocal microscope	with a 1.40 NA 63x oil immersion objective. the pinhole size was set to 0.5 airy units.	45 x 45 nm
deepbacs-ecoli2-dn	225	59				DN	MreB	512 x 512	512 x 512	5	denoising	MreB-sfGFPsw expressing E. coli (Escherichia coli) cells	MreB filament	sfGFP (superfolder GFP)	confocal microscope	with a 1.40 NA 63x oil immersion objective. the pinhole size was set to 0.3 airy units.	45 x 45 nm	confocal microscope	with a 1.40 NA 63x oil immersion objective. the pinhole size was set to 0.5 airy units.	45 x 45 nm
w2s-c0-dn-1	226	60				DN	Mito	512 x 512	512 x 512	8	denoising	human cell	mitochondria	Alexa Fluor 488 (green)	wide-field microscope	with a Plan Apochromat TIRF 100X, 1.49-NA objective.	100 x 100 nm	wide-field microscope	with a Plan Apochromat TIRF 100X, 1.49NA objective.	100 x 100 nm
w2s-c0-dn-2	227					DN	Mito	512 x 512	512 x 512	8	denoising	human cell	mitochondria	Alexa Fluor 488 (green)	wide-field microscope	with a Plan Apochromat TIRF 100X, 1.49-NA objective.	100 x 100 nm	wide-field microscope	with a Plan Apochromat TIRF 100X, 1.49NA objective.	100 x 100 nm
w2s-c0-dn-3	228	61				DN	Mito	512 x 512	512 x 512	8	denoising	human cell	mitochondria	Alexa Fluor 488 (green)	wide-field microscope	with a Plan Apochromat TIRF 100X, 1.49-NA objective.	100 x 100 nm	wide-field microscope	with a Plan Apochromat TIRF 100X, 1.49NA objective.	100 x 100 nm
w2s-c0-dn-4	229					DN	Mito	512 x 512	512 x 512	8	denoising	human cell	mitochondria	Alexa Fluor 488 (green)	wide-field microscope	with a Plan Apochromat TIRF 100X, 1.49-NA objective.	100 x 100 nm	wide-field microscope	with a Plan Apochromat TIRF 100X, 1.49NA objective.	100 x 100 nm
w2s-c0-dn-5	230					DN	Mito	512 x 512	512 x 512	8	denoising	human cell	mitochondria	Alexa Fluor 488 (green)	wide-field microscope	with a Plan Apochromat TIRF 100X, 1.49-NA objective.	100 x 100 nm	wide-field microscope	with a Plan Apochromat TIRF 100X, 1.49NA objective.	100 x 100 nm
w2s-c0-dn-6	231					DN	Mito	512 x 512	512 x 512	8	denoising	human cell	mitochondria	Alexa Fluor 488 (green)	wide-field microscope	with a Plan Apochromat TIRF 100X, 1.49-NA objective.	100 x 100 nm	wide-field microscope	with a Plan Apochromat TIRF 100X, 1.49NA objective.	100 x 100 nm
w2s-c1-dn-1	232	62				DN	lysosome	512 x 512	512 x 512	8	denoising	human cell	lysosome	Alexa Fluor 561 (yellow)	wide-field microscope	with a Plan Apochromat TIRF 100X, 1.49-NA objective.	100 x 100 nm	wide-field microscope	with a Plan Apochromat TIRF 100X, 1.49NA objective.	100 x 100 nm
w2s-c1-dn-2	233					DN	lysosome	512 x 512	512 x 512	8	denoising	human cell	lysosome	Alexa Fluor 561 (yellow)	wide-field microscope	with a Plan Apochromat TIRF 100X, 1.49-NA objective.	100 x 100 nm	wide-field microscope	with a Plan Apochromat TIRF 100X, 1.49NA objective.	100 x 100 nm
w2s-c1-dn-3	234	63				DN	lysosome	512 x 512	512 x 512	8	denoising	human cell	lysosome	Alexa Fluor 561 (yellow)	wide-field microscope	with a Plan Apochromat TIRF 100X, 1.49-NA objective.	100 x 100 nm	wide-field microscope	with a Plan Apochromat TIRF 100X, 1.49NA objective.	100 x 100 nm
w2s-c1-dn-4	235					DN	lysosome	512 x 512	512 x 512	8	denoising	human cell	lysosome	Alexa Fluor 561 (yellow)	wide-field microscope	with a Plan Apochromat TIRF 100X, 1.49-NA objective.	100 x 100 nm	wide-field microscope	with a Plan Apochromat TIRF 100X, 1.49NA objective.	100 x 100 nm
w2s-c1-dn-5	236					DN	lysosome	512 x 512	512 x 512	8	denoising	human cell	lysosome	Alexa Fluor 561 (yellow)	wide-field microscope	with a Plan Apochromat TIRF 100X, 1.49-NA objective.	100 x 100 nm	wide-field microscope	with a Plan Apochromat TIRF 100X, 1.49NA objective.	100 x 100 nm
w2s-c1-dn-6	237					DN	lysosome	512 x 512	512 x 512	8	denoising	human cell	lysosome	Alexa Fluor 561 (yellow)	wide-field microscope	with a Plan Apochromat TIRF 100X, 1.49-NA objective.	100 x 100 nm	wide-field microscope	with a Plan Apochromat TIRF 100X, 1.49NA objective.	100 x 100 nm
w2s-c2-dn-1	238	64				DN	F-actin	512 x 512	512 x 512	8	denoising	human cell	actin filament	Alexa Fluor 640 (red)	wide-field microscope	with a Plan Apochromat TIRF 100X, 1.49-NA objective.	100 x 100 nm	wide-field microscope	with a Plan Apochromat TIRF 100X, 1.49NA objective.	100 x 100 nm
w2s-c2-dn-2	239					DN	F-actin	512 x 512	512 x 512	8	denoising	human cell	actin filament	Alexa Fluor 640 (red)	wide-field microscope	with a Plan Apochromat TIRF 100X, 1.49-NA objective.	100 x 100 nm	wide-field microscope	with a Plan Apochromat TIRF 100X, 1.49NA objective.	100 x 100 nm
w2s-c2-dn-3	240	65				DN	F-actin	512 x 512	512 x 512	8	denoising	human cell	actin filament	Alexa Fluor 640 (red)	wide-field microscope	with a Plan Apochromat TIRF 100X, 1.49-NA objective.	100 x 100 nm	wide-field microscope	with a Plan Apochromat TIRF 100X, 1.49NA objective.	100 x 100 nm
w2s-c2-dn-4	241					DN	F-actin	512 x 512	512 x 512	8	denoising	human cell	actin filament	Alexa Fluor 640 (red)	wide-field microscope	with a Plan Apochromat TIRF 100X, 1.49-NA objective.	100 x 100 nm	wide-field microscope	with a Plan Apochromat TIRF 100X, 1.49NA objective.	100 x 100 nm
w2s-c2-dn-5	242					DN	F-actin	512 x 512	512 x 512	8	denoising	human cell	actin filament	Alexa Fluor 640 (red)	wide-field microscope	with a Plan Apochromat TIRF 100X, 1.49-NA objective.	100 x 100 nm	wide-field microscope	with a Plan Apochromat TIRF 100X, 1.49NA objective.	100 x 100 nm
w2s-c2-dn-6	243					DN	F-actin	512 x 512	512 x 512	8	denoising	human cell	actin filament	Alexa Fluor 640 (red)	wide-field microscope	with a Plan Apochromat TIRF 100X, 1.49-NA objective.	100 x 100 nm	wide-field microscope	with a Plan Apochromat TIRF 100X, 1.49NA objective.	100 x 100 nm
srcaco2-h2b-dn-8	244	66			31	DN	histone	128 x 128	1024 x 1024	8	denoising	Caco-2 cell	histone	mCherry (RFP)	confocal microscope	with a 20x/0.8-NA objective lens.	4000 x 4000 nm	confocal microscope	with a 20x/0.8NA objective lens.	4000 x 4000 nm
srcaco2-h2b-dn-4	245	67			32	DN	histone	256 x 256	1024 x 1024	8	denoising	Caco-2 cell	histone	mCherry (RFP)	confocal microscope	with a 20x/0.8-NA objective lens.	2000 x 2000 nm	confocal microscope	with a 20x/0.8NA objective lens.	2000 x 2000 nm
srcaco2-h2b-dn-2	246	68			33	DN	histone	512 x 512	1024 x 1024	8	denoising	Caco-2 cell	histone	mCherry (RFP)	confocal microscope	with a 20x/0.8-NA objective lens.	1000 x 1000 nm	confocal microscope	with a 20x/0.8NA objective lens.	1000 x 1000 nm
srcaco2-survivin-dn-8	247	69				DN	survivin	128 x 128	1024 x 1024	8	denoising	Caco-2 cell	survivin	unknown	confocal microscope	with a 20x/0.8-NA objective lens.	4000 x 4000 nm	confocal microscope	with a 20x/0.8NA objective lens.	4000 x 4000 nm
srcaco2-survivin-dn-4	248	70				DN	survivin	256 x 256	1024 x 1024	8	denoising	Caco-2 cell	survivin	unknown	confocal microscope	with a 20x/0.8-NA objective lens.	2000 x 2000 nm	confocal microscope	with a 20x/0.8NA objective lens.	2000 x 2000 nm
srcaco2-survivin-dn-2	249	71				DN	survivin	512 x 512	1024 x 1024	8	denoising	Caco-2 cell	survivin	unknown	confocal microscope	with a 20x/0.8-NA objective lens.	1000 x 1000 nm	confocal microscope	with a 20x/0.8NA objective lens.	1000 x 1000 nm
srcaco2-tubulin-dn-8	250	72				DN	tubulin	128 x 128	1024 x 1024	8	denoising	Caco-2 cell	tubulin	GFP (green)	confocal microscope	with a 20x/0.8-NA objective lens.	4000 x 4000 nm	confocal microscope	with a 20x/0.8NA objective lens.	4000 x 4000 nm
srcaco2-tubulin-dn-4	251	73				DN	tubulin	256 x 256	1024 x 1024	8	denoising	Caco-2 cell	tubulin	GFP (green)	confocal microscope	with a 20x/0.8-NA objective lens.	2000 x 2000 nm	confocal microscope	with a 20x/0.8NA objective lens.	2000 x 2000 nm
srcaco2-tubulin-dn-2	252	74				DN	tubulin	512 x 512	1024 x 1024	8	denoising	Caco-2 cell	tubulin	GFP (green)	confocal microscope	with a 20x/0.8-NA objective lens.	1000 x 1000 nm	confocal microscope	with a 20x/0.8NA objective lens.	1000 x 1000 nm
fmd-confocal-bpae-b-avg2	253	75			23	DN	nuclei	512 x 512	512 x 512	8	denoising	fixed bovine pulmonary artery endothelial (BPAE) cell	nuclei	DAPI (blue)	confocal microscope	with a Nikon Apo LWD 40x, 1.15 NA water immersion objective.	300 x 300 nm	confocal microscope	with a Nikon Apo LWD 40x, 1.15 NA water immersion objective.	300 x 300 nm
fmd-confocal-bpae-b-avg4	254					DN	nuclei	512 x 512	512 x 512	8	denoising	fixed bovine pulmonary artery endothelial (BPAE) cell	nuclei	DAPI (blue)	confocal microscope	with a Nikon Apo LWD 40x, 1.15 NA water immersion objective.	300 x 300 nm	confocal microscope	with a Nikon Apo LWD 40x, 1.15 NA water immersion objective.	300 x 300 nm
fmd-confocal-bpae-b-avg8	255					DN	nuclei	512 x 512	512 x 512	8	denoising	fixed bovine pulmonary artery endothelial (BPAE) cell	nuclei	DAPI (blue)	confocal microscope	with a Nikon Apo LWD 40x, 1.15 NA water immersion objective.	300 x 300 nm	confocal microscope	with a Nikon Apo LWD 40x, 1.15 NA water immersion objective.	300 x 300 nm
fmd-confocal-bpae-b-avg16	256	76				DN	nuclei	512 x 512	512 x 512	8	denoising	fixed bovine pulmonary artery endothelial (BPAE) cell	nuclei	DAPI (blue)	confocal microscope	with a Nikon Apo LWD 40x, 1.15 NA water immersion objective.	300 x 300 nm	confocal microscope	with a Nikon Apo LWD 40x, 1.15 NA water immersion objective.	300 x 300 nm
fmd-confocal-bpae-g-avg2	257	77				DN	F-actin	512 x 512	512 x 512	8	denoising	fixed bovine pulmonary artery endothelial (BPAE) cell	actin filament	Alexa Fluor 488 (green)	confocal microscope	with a Nikon Apo LWD 40x, 1.15 NA water immersion objective.	300 x 300 nm	confocal microscope	with a Nikon Apo LWD 40x, 1.15 NA water immersion objective.	300 x 300 nm
fmd-confocal-bpae-g-avg4	258					DN	F-actin	512 x 512	512 x 512	8	denoising	fixed bovine pulmonary artery endothelial (BPAE) cell	actin filament	Alexa Fluor 488 (green)	confocal microscope	with a Nikon Apo LWD 40x, 1.15 NA water immersion objective.	300 x 300 nm	confocal microscope	with a Nikon Apo LWD 40x, 1.15 NA water immersion objective.	300 x 300 nm
fmd-confocal-bpae-g-avg8	259					DN	F-actin	512 x 512	512 x 512	8	denoising	fixed bovine pulmonary artery endothelial (BPAE) cell	actin filament	Alexa Fluor 488 (green)	confocal microscope	with a Nikon Apo LWD 40x, 1.15 NA water immersion objective.	300 x 300 nm	confocal microscope	with a Nikon Apo LWD 40x, 1.15 NA water immersion objective.	300 x 300 nm
fmd-confocal-bpae-g-avg16	260	78				DN	F-actin	512 x 512	512 x 512	8	denoising	fixed bovine pulmonary artery endothelial (BPAE) cell	actin filament	Alexa Fluor 488 (green)	confocal microscope	with a Nikon Apo LWD 40x, 1.15 NA water immersion objective.	300 x 300 nm	confocal microscope	with a Nikon Apo LWD 40x, 1.15 NA water immersion objective.	300 x 300 nm
fmd-confocal-bpae-r-avg2	261	79				DN	Mito	512 x 512	512 x 512	8	denoising	fixed bovine pulmonary artery endothelial (BPAE) cell	mitochondria	MitoTracker Red CMXRos (red)	confocal microscope	with a Nikon Apo LWD 40x, 1.15 NA water immersion objective.	300 x 300 nm	confocal microscope	with a Nikon Apo LWD 40x, 1.15 NA water immersion objective.	300 x 300 nm
fmd-confocal-bpae-r-avg4	262					DN	Mito	512 x 512	512 x 512	8	denoising	fixed bovine pulmonary artery endothelial (BPAE) cell	mitochondria	MitoTracker Red CMXRos (red)	confocal microscope	with a Nikon Apo LWD 40x, 1.15 NA water immersion objective.	300 x 300 nm	confocal microscope	with a Nikon Apo LWD 40x, 1.15 NA water immersion objective.	300 x 300 nm
fmd-confocal-bpae-r-avg8	263					DN	Mito	512 x 512	512 x 512	8	denoising	fixed bovine pulmonary artery endothelial (BPAE) cell	mitochondria	MitoTracker Red CMXRos (red)	confocal microscope	with a Nikon Apo LWD 40x, 1.15 NA water immersion objective.	300 x 300 nm	confocal microscope	with a Nikon Apo LWD 40x, 1.15 NA water immersion objective.	300 x 300 nm
fmd-confocal-bpae-r-avg16	264	80				DN	Mito	512 x 512	512 x 512	8	denoising	fixed bovine pulmonary artery endothelial (BPAE) cell	mitochondria	MitoTracker Red CMXRos (red)	confocal microscope	with a Nikon Apo LWD 40x, 1.15 NA water immersion objective.	300 x 300 nm	confocal microscope	with a Nikon Apo LWD 40x, 1.15 NA water immersion objective.	300 x 300 nm
fmd-confocal-fish-avg2	265	81				DN	NCC	512 x 512	512 x 512	8	denoising	fixed zebrafish embryos	neural crest cells	eGFP (GFP)	confocal microscope	with a Nikon Apo LWD 40x, 1.15 NA water immersion objective.	300 x 300 nm	confocal microscope	with a Nikon Apo LWD 40x, 1.15 NA water immersion objective.	300 x 300 nm
fmd-confocal-fish-avg4	266					DN	NCC	512 x 512	512 x 512	8	denoising	fixed zebrafish embryos	neural crest cells	eGFP (GFP)	confocal microscope	with a Nikon Apo LWD 40x, 1.15 NA water immersion objective.	300 x 300 nm	confocal microscope	with a Nikon Apo LWD 40x, 1.15 NA water immersion objective.	300 x 300 nm
fmd-confocal-fish-avg8	267					DN	NCC	512 x 512	512 x 512	8	denoising	fixed zebrafish embryos	neural crest cells	eGFP (GFP)	confocal microscope	with a Nikon Apo LWD 40x, 1.15 NA water immersion objective.	300 x 300 nm	confocal microscope	with a Nikon Apo LWD 40x, 1.15 NA water immersion objective.	300 x 300 nm
fmd-confocal-fish-avg16	268	82				DN	NCC	512 x 512	512 x 512	8	denoising	fixed zebrafish embryos	neural crest cells	eGFP (GFP)	confocal microscope	with a Nikon Apo LWD 40x, 1.15 NA water immersion objective.	300 x 300 nm	confocal microscope	with a Nikon Apo LWD 40x, 1.15 NA water immersion objective.	300 x 300 nm
fmd-confocal-mice-avg2	269	83				DN	chromosome	512 x 512	512 x 512	8	denoising	fixed mouse brain tissues	chromosome	DAPI (blue)	confocal microscope	with a Nikon Apo LWD 40x, 1.15 NA water immersion objective.	300 x 300 nm	confocal microscope	with a Nikon Apo LWD 40x, 1.15 NA water immersion objective.	300 x 300 nm
fmd-confocal-mice-avg4	270					DN	chromosome	512 x 512	512 x 512	8	denoising	fixed mouse brain tissues	chromosome	DAPI (blue)	confocal microscope	with a Nikon Apo LWD 40x, 1.15 NA water immersion objective.	300 x 300 nm	confocal microscope	with a Nikon Apo LWD 40x, 1.15 NA water immersion objective.	300 x 300 nm
fmd-confocal-mice-avg8	271					DN	chromosome	512 x 512	512 x 512	8	denoising	fixed mouse brain tissues	chromosome	DAPI (blue)	confocal microscope	with a Nikon Apo LWD 40x, 1.15 NA water immersion objective.	300 x 300 nm	confocal microscope	with a Nikon Apo LWD 40x, 1.15 NA water immersion objective.	300 x 300 nm
fmd-confocal-mice-avg16	272	84				DN	chromosome	512 x 512	512 x 512	8	denoising	fixed mouse brain tissues	chromosome	DAPI (blue)	confocal microscope	with a Nikon Apo LWD 40x, 1.15 NA water immersion objective.	300 x 300 nm	confocal microscope	with a Nikon Apo LWD 40x, 1.15 NA water immersion objective.	300 x 300 nm
fmd-twophoton-mice-avg2	273	85				DN	chromosome	512 x 512	512 x 512	8	denoising	fixed mouse brain tissues	chromosome	DAPI (blue)	confocal microscope in two-photon imaging mode	with a Nikon Apo LWD 40x, 1.15 NA water immersion objective.	300 x 300 nm	confocal microscope in two-photon imaging mode	with a Nikon Apo LWD 40x, 1.15 NA water immersion objective.	300 x 300 nm
fmd-twophoton-mice-avg4	274					DN	chromosome	512 x 512	512 x 512	8	denoising	fixed mouse brain tissues	chromosome	DAPI (blue)	confocal microscope in two-photon imaging mode	with a Nikon Apo LWD 40x, 1.15 NA water immersion objective.	300 x 300 nm	confocal microscope in two-photon imaging mode	with a Nikon Apo LWD 40x, 1.15 NA water immersion objective.	300 x 300 nm
fmd-twophoton-mice-avg8	275					DN	chromosome	512 x 512	512 x 512	8	denoising	fixed mouse brain tissues	chromosome	DAPI (blue)	confocal microscope in two-photon imaging mode	with a Nikon Apo LWD 40x, 1.15 NA water immersion objective.	300 x 300 nm	confocal microscope in two-photon imaging mode	with a Nikon Apo LWD 40x, 1.15 NA water immersion objective.	300 x 300 nm
fmd-twophoton-mice-avg16	276	86				DN	chromosome	512 x 512	512 x 512	8	denoising	fixed mouse brain tissues	chromosome	DAPI (blue)	confocal microscope in two-photon imaging mode	with a Nikon Apo LWD 40x, 1.15 NA water immersion objective.	300 x 300 nm	confocal microscope in two-photon imaging mode	with a Nikon Apo LWD 40x, 1.15 NA water immersion objective.	300 x 300 nm
fmd-twophoton-bpae-b-avg2	277	87			24	DN	nuclei	512 x 512	512 x 512	8	denoising	fixed bovine pulmonary artery endothelial (BPAE) cell	nuclei	DAPI (blue)	confocal microscope in two-photon imaging mode	with a Nikon Apo LWD 40x, 1.15 NA water immersion objective.	300 x 300 nm	confocal microscope in two-photon imaging mode	with a Nikon Apo LWD 40x, 1.15 NA water immersion objective.	300 x 300 nm
fmd-twophoton-bpae-b-avg4	278					DN	nuclei	512 x 512	512 x 512	8	denoising	fixed bovine pulmonary artery endothelial (BPAE) cell	nuclei	DAPI (blue)	confocal microscope in two-photon imaging mode	with a Nikon Apo LWD 40x, 1.15 NA water immersion objective.	300 x 300 nm	confocal microscope in two-photon imaging mode	with a Nikon Apo LWD 40x, 1.15 NA water immersion objective.	300 x 300 nm
fmd-twophoton-bpae-b-avg8	279					DN	nuclei	512 x 512	512 x 512	8	denoising	fixed bovine pulmonary artery endothelial (BPAE) cell	nuclei	DAPI (blue)	confocal microscope in two-photon imaging mode	with a Nikon Apo LWD 40x, 1.15 NA water immersion objective.	300 x 300 nm	confocal microscope in two-photon imaging mode	with a Nikon Apo LWD 40x, 1.15 NA water immersion objective.	300 x 300 nm
fmd-twophoton-bpae-b-avg16	280	88				DN	nuclei	512 x 512	512 x 512	8	denoising	fixed bovine pulmonary artery endothelial (BPAE) cell	nuclei	DAPI (blue)	confocal microscope in two-photon imaging mode	with a Nikon Apo LWD 40x, 1.15 NA water immersion objective.	300 x 300 nm	confocal microscope in two-photon imaging mode	with a Nikon Apo LWD 40x, 1.15 NA water immersion objective.	300 x 300 nm
fmd-twophoton-bpae-g-avg2	281	89				DN	F-actin	512 x 512	512 x 512	8	denoising	fixed bovine pulmonary artery endothelial (BPAE) cell	actin filament	Alexa Fluor 488 (green)	confocal microscope in two-photon imaging mode	with a Nikon Apo LWD 40x, 1.15 NA water immersion objective.	300 x 300 nm	confocal microscope in two-photon imaging mode	with a Nikon Apo LWD 40x, 1.15 NA water immersion objective.	300 x 300 nm
fmd-twophoton-bpae-g-avg4	282					DN	F-actin	512 x 512	512 x 512	8	denoising	fixed bovine pulmonary artery endothelial (BPAE) cell	actin filament	Alexa Fluor 488 (green)	confocal microscope in two-photon imaging mode	with a Nikon Apo LWD 40x, 1.15 NA water immersion objective.	300 x 300 nm	confocal microscope in two-photon imaging mode	with a Nikon Apo LWD 40x, 1.15 NA water immersion objective.	300 x 300 nm
fmd-twophoton-bpae-g-avg8	283					DN	F-actin	512 x 512	512 x 512	8	denoising	fixed bovine pulmonary artery endothelial (BPAE) cell	actin filament	Alexa Fluor 488 (green)	confocal microscope in two-photon imaging mode	with a Nikon Apo LWD 40x, 1.15 NA water immersion objective.	300 x 300 nm	confocal microscope in two-photon imaging mode	with a Nikon Apo LWD 40x, 1.15 NA water immersion objective.	300 x 300 nm
fmd-twophoton-bpae-g-avg16	284	90				DN	F-actin	512 x 512	512 x 512	8	denoising	fixed bovine pulmonary artery endothelial (BPAE) cell	actin filament	Alexa Fluor 488 (green)	confocal microscope in two-photon imaging mode	with a Nikon Apo LWD 40x, 1.15 NA water immersion objective.	300 x 300 nm	confocal microscope in two-photon imaging mode	with a Nikon Apo LWD 40x, 1.15 NA water immersion objective.	300 x 300 nm
fmd-twophoton-bpae-r-avg2	285	91				DN	Mito	512 x 512	512 x 512	8	denoising	fixed bovine pulmonary artery endothelial (BPAE) cell	mitochondria	MitoTracker Red CMXRos (red)	confocal microscope in two-photon imaging mode	with a Nikon Apo LWD 40x, 1.15 NA water immersion objective.	300 x 300 nm	confocal microscope in two-photon imaging mode	with a Nikon Apo LWD 40x, 1.15 NA water immersion objective.	300 x 300 nm
fmd-twophoton-bpae-r-avg4	286					DN	Mito	512 x 512	512 x 512	8	denoising	fixed bovine pulmonary artery endothelial (BPAE) cell	mitochondria	MitoTracker Red CMXRos (red)	confocal microscope in two-photon imaging mode	with a Nikon Apo LWD 40x, 1.15 NA water immersion objective.	300 x 300 nm	confocal microscope in two-photon imaging mode	with a Nikon Apo LWD 40x, 1.15 NA water immersion objective.	300 x 300 nm
fmd-twophoton-bpae-r-avg8	287					DN	Mito	512 x 512	512 x 512	8	denoising	fixed bovine pulmonary artery endothelial (BPAE) cell	mitochondria	MitoTracker Red CMXRos (red)	confocal microscope in two-photon imaging mode	with a Nikon Apo LWD 40x, 1.15 NA water immersion objective.	300 x 300 nm	confocal microscope in two-photon imaging mode	with a Nikon Apo LWD 40x, 1.15 NA water immersion objective.	300 x 300 nm
fmd-twophoton-bpae-r-avg16	288	92				DN	Mito	512 x 512	512 x 512	8	denoising	fixed bovine pulmonary artery endothelial (BPAE) cell	mitochondria	MitoTracker Red CMXRos (red)	confocal microscope in two-photon imaging mode	with a Nikon Apo LWD 40x, 1.15 NA water immersion objective.	300 x 300 nm	confocal microscope in two-photon imaging mode	with a Nikon Apo LWD 40x, 1.15 NA water immersion objective.	300 x 300 nm
fmd-wf-bpae-b-avg2	289	93			25	DN	nuclei	512 x 512	512 x 512	8	denoising	fixed bovine pulmonary artery endothelial (BPAE) cell	nuclei	DAPI (blue)	wide-field microscope	with a Nikon Plan Fluor 40x, 0.75 NA objective.	170 x 170 nm	wide-field microscope	with a Nikon Plan Fluor 40x, 0.75 NA objective.	170 x 170 nm
fmd-wf-bpae-b-avg4	290					DN	nuclei	512 x 512	512 x 512	8	denoising	fixed bovine pulmonary artery endothelial (BPAE) cell	nuclei	DAPI (blue)	wide-field microscope	with a Nikon Plan Fluor 40x, 0.75 NA objective.	170 x 170 nm	wide-field microscope	with a Nikon Plan Fluor 40x, 0.75 NA objective.	170 x 170 nm
fmd-wf-bpae-b-avg8	291					DN	nuclei	512 x 512	512 x 512	8	denoising	fixed bovine pulmonary artery endothelial (BPAE) cell	nuclei	DAPI (blue)	wide-field microscope	with a Nikon Plan Fluor 40x, 0.75 NA objective.	170 x 170 nm	wide-field microscope	with a Nikon Plan Fluor 40x, 0.75 NA objective.	170 x 170 nm
fmd-wf-bpae-b-avg16	292	94				DN	nuclei	512 x 512	512 x 512	8	denoising	fixed bovine pulmonary artery endothelial (BPAE) cell	nuclei	DAPI (blue)	wide-field microscope	with a Nikon Plan Fluor 40x, 0.75 NA objective.	170 x 170 nm	wide-field microscope	with a Nikon Plan Fluor 40x, 0.75 NA objective.	170 x 170 nm
fmd-wf-bpae-g-avg2	293	95				DN	F-actin	512 x 512	512 x 512	8	denoising	fixed bovine pulmonary artery endothelial (BPAE) cell	actin filament	Alexa Fluor 488 (green)	wide-field microscope	with a Nikon Plan Fluor 40x, 0.75 NA objective.	170 x 170 nm	wide-field microscope	with a Nikon Plan Fluor 40x, 0.75 NA objective.	170 x 170 nm
fmd-wf-bpae-g-avg4	294					DN	F-actin	512 x 512	512 x 512	8	denoising	fixed bovine pulmonary artery endothelial (BPAE) cell	actin filament	Alexa Fluor 488 (green)	wide-field microscope	with a Nikon Plan Fluor 40x, 0.75 NA objective.	170 x 170 nm	wide-field microscope	with a Nikon Plan Fluor 40x, 0.75 NA objective.	170 x 170 nm
fmd-wf-bpae-g-avg8	295					DN	F-actin	512 x 512	512 x 512	8	denoising	fixed bovine pulmonary artery endothelial (BPAE) cell	actin filament	Alexa Fluor 488 (green)	wide-field microscope	with a Nikon Plan Fluor 40x, 0.75 NA objective.	170 x 170 nm	wide-field microscope	with a Nikon Plan Fluor 40x, 0.75 NA objective.	170 x 170 nm
fmd-wf-bpae-g-avg16	296	96				DN	F-actin	512 x 512	512 x 512	8	denoising	fixed bovine pulmonary artery endothelial (BPAE) cell	actin filament	Alexa Fluor 488 (green)	wide-field microscope	with a Nikon Plan Fluor 40x, 0.75 NA objective.	170 x 170 nm	wide-field microscope	with a Nikon Plan Fluor 40x, 0.75 NA objective.	170 x 170 nm
fmd-wf-bpae-r-avg2	297	97				DN	Mito	512 x 512	512 x 512	8	denoising	fixed bovine pulmonary artery endothelial (BPAE) cell	mitochondria	MitoTracker Red CMXRos (red)	wide-field microscope	with a Nikon Plan Fluor 40x, 0.75 NA objective.	170 x 170 nm	wide-field microscope	with a Nikon Plan Fluor 40x, 0.75 NA objective.	170 x 170 nm
fmd-wf-bpae-r-avg4	298					DN	Mito	512 x 512	512 x 512	8	denoising	fixed bovine pulmonary artery endothelial (BPAE) cell	mitochondria	MitoTracker Red CMXRos (red)	wide-field microscope	with a Nikon Plan Fluor 40x, 0.75 NA objective.	170 x 170 nm	wide-field microscope	with a Nikon Plan Fluor 40x, 0.75 NA objective.	170 x 170 nm
fmd-wf-bpae-r-avg8	299					DN	Mito	512 x 512	512 x 512	8	denoising	fixed bovine pulmonary artery endothelial (BPAE) cell	mitochondria	MitoTracker Red CMXRos (red)	wide-field microscope	with a Nikon Plan Fluor 40x, 0.75 NA objective.	170 x 170 nm	wide-field microscope	with a Nikon Plan Fluor 40x, 0.75 NA objective.	170 x 170 nm
fmd-wf-bpae-r-avg16	300	98				DN	Mito	512 x 512	512 x 512	8	denoising	fixed bovine pulmonary artery endothelial (BPAE) cell	mitochondria	MitoTracker Red CMXRos (red)	wide-field microscope	with a Nikon Plan Fluor 40x, 0.75 NA objective.	170 x 170 nm	wide-field microscope	with a Nikon Plan Fluor 40x, 0.75 NA objective.	170 x 170 nm
rcan3d-dn-golgi-dn	301	99			60	DN	Golgi	1550 x 1920	1550 x 1920	8	denoising	fixed U2OS cell	Golgi	GFP (green)	instant structured illumination microscope	with a 60x /1.42 numerical aperture (NA) oil objective (Olympus).	50 x 50 nm	instant structured illumination microscope	with a 60x/1.42 numerical aperture (NA) oil objective (Olympus).	50 x 50 nm
vmsim3-mito-sr-crop			0			SR	Mito	448 x 448	896 x 896	8	super-resolution with a scale factor of 2	live U2OS cell	mitochondria	MitoTracker Green (green)	wide-field microscope	with a 60x, 1.45 NA oil-immersion objective.	80 x 80 nm. Nearest interpolation with a factor of 2	structured illumination microscope	with a 60x, 1.45 NA oil-immersion objective.	40 x 40 nm
biotisr-ccp-sr-1			1	3		SR	CCP	512 x 512	1024 x 1024	8	super-resolution with a scale factor of 2	live SUM-159 cell	clathrin-coated pits	mEmerald (GFP)	wide-field microscope	with excitation numerical aperture (NA) of 1.41.	60.4 x 60.4 nm. Nearest interpolation with a factor of 2	linear structured illumination microscope	with excitation numerical aperture (NA) of 1.41.	30.2 x 30.2 nm
biotisr-ccp-sr-2			2	4		SR	CCP	512 x 512	1024 x 1024	8	super-resolution with a scale factor of 2	live SUM-159 cell	clathrin-coated pits	mEmerald (GFP)	wide-field microscope	with excitation numerical aperture (NA) of 1.41.	60.4 x 60.4 nm. Nearest interpolation with a factor of 2	linear structured illumination microscope	with excitation numerical aperture (NA) of 1.41.	30.2 x 30.2 nm
biotisr-ccp-sr-3			3	5		SR	CCP	512 x 512	1024 x 1024	8	super-resolution with a scale factor of 2	live SUM-159 cell	clathrin-coated pits	mEmerald (GFP)	wide-field microscope	with excitation numerical aperture (NA) of 1.41.	60.4 x 60.4 nm. Nearest interpolation with a factor of 2	linear structured illumination microscope	with excitation numerical aperture (NA) of 1.41.	30.2 x 30.2 nm
biotisr-factin-sr-1			4	6		SR	F-actin	512 x 512	1024 x 1024	8	super-resolution with a scale factor of 2	live COS-7 cell	actin filament	mEmerald (GFP)	wide-field microscope	with excitation numerical aperture (NA) of 1.41.	60.4 x 60.4 nm. Nearest interpolation with a factor of 2	linear structured illumination microscope	with excitation numerical aperture (NA) of 1.41.	30.2 x 30.2 nm
biotisr-factin-sr-2			5	7		SR	F-actin	512 x 512	1024 x 1024	8	super-resolution with a scale factor of 2	live COS-7 cell	actin filament	mEmerald (GFP)	wide-field microscope	with excitation numerical aperture (NA) of 1.41.	60.4 x 60.4 nm. Nearest interpolation with a factor of 2	linear structured illumination microscope	with excitation numerical aperture (NA) of 1.41.	30.2 x 30.2 nm
biotisr-factin-sr-3			6	8		SR	F-actin	512 x 512	1024 x 1024	8	super-resolution with a scale factor of 2	live COS-7 cell	actin filament	mEmerald (GFP)	wide-field microscope	with excitation numerical aperture (NA) of 1.41.	60.4 x 60.4 nm. Nearest interpolation with a factor of 2	linear structured illumination microscope	with excitation numerical aperture (NA) of 1.41.	30.2 x 30.2 nm
biotisr-lysosome-sr-1			7	9		SR	lysosome	512 x 512	1024 x 1024	8	super-resolution with a scale factor of 2	live COS-7 cell	lysosome	yellow	wide-field microscope	with excitation numerical aperture (NA) of 1.35.	60.4 x 60.4 nm. Nearest interpolation with a factor of 2	linear structured illumination microscope	with excitation numerical aperture (NA) of 1.35.	30.2 x 30.2 nm
biotisr-lysosome-sr-2			8	10		SR	lysosome	512 x 512	1024 x 1024	8	super-resolution with a scale factor of 2	live COS-7 cell	lysosome	yellow	wide-field microscope	with excitation numerical aperture (NA) of 1.35.	60.4 x 60.4 nm. Nearest interpolation with a factor of 2	linear structured illumination microscope	with excitation numerical aperture (NA) of 1.35.	30.2 x 30.2 nm
biotisr-lysosome-sr-3			9	11		SR	lysosome	512 x 512	1024 x 1024	8	super-resolution with a scale factor of 2	live COS-7 cell	lysosome	yellow	wide-field microscope	with excitation numerical aperture (NA) of 1.35.	60.4 x 60.4 nm. Nearest interpolation with a factor of 2	linear structured illumination microscope	with excitation numerical aperture (NA) of 1.35.	30.2 x 30.2 nm
biotisr-mt-sr-1			10	0		SR	MT	512 x 512	1024 x 1024	8	super-resolution with a scale factor of 2	live COS-7 cell	microtubule	mEmerald (green)	wide-field microscope	with excitation numerical aperture (NA) of 1.35.	60.4 x 60.4 nm. Nearest interpolation with a factor of 2	linear structured illumination microscope	with excitation numerical aperture (NA) of 1.35.	30.2 x 30.2 nm
biotisr-mt-sr-2			11	1		SR	MT	512 x 512	1024 x 1024	8	super-resolution with a scale factor of 2	live COS-7 cell	microtubule	mEmerald (green)	wide-field microscope	with excitation numerical aperture (NA) of 1.35.	60.4 x 60.4 nm. Nearest interpolation with a factor of 2	linear structured illumination microscope	with excitation numerical aperture (NA) of 1.35.	30.2 x 30.2 nm
biotisr-mt-sr-3			12	2		SR	MT	512 x 512	1024 x 1024	8	super-resolution with a scale factor of 2	live COS-7 cell	microtubule	mEmerald (green)	wide-field microscope	with excitation numerical aperture (NA) of 1.35.	60.4 x 60.4 nm. Nearest interpolation with a factor of 2	linear structured illumination microscope	with excitation numerical aperture (NA) of 1.35.	30.2 x 30.2 nm
sim-actin-3d-dcv			13			DCV	F-actin	1900 x 1904	1900 x 1904	6	deconvolution	NIH 3T3 cell	actin filament	eGFP (GFP)	wide-field microscope	with a 63x 1.4 NA Plan Apo objective.	40 x 40 nm	structured illumination microscope	with a 63x 1.4 NA Plan Apo objective	40 x 40 nm
sim-microtubule-3d-dcv			14			DCV	MT	1900 x 1904	1900 x 1904	8	deconvolution	Drosophila S2 cell	microtubule	Alexa Fluor 488 (green)	wide-field microscope	unknown	39.7 x 39.7 nm	structured illumination microscope	unknown	39.7 x39.7 nm
sim-microtubule-2d-patch-dcv			15			DCV	MT	512 x 512	512 x 512	8	deconvolution	Drosophila S2 cell	microtubule	Alexa Fluor 488 (green)	wide-field microscope	unknown	39.7 x 39.7 nm	structured illumination microscope	unknown	39.7 x39.7 nm
vmsim3-mito-dcv-crop			16			DCV	Mito	448 x 448	896 x 896	8	deconvolution	live U2OS cell	mitochondria	MitoTracker Green (green)	wide-field microscope	with a 60x, 1.45 NA oil-immersion objective.	80 x 80 nm	structured illumination microscope	with a 60x, 1.45 NA oil-immersion objective.	80 x 80 nm
vmsim488-bead-patch-dcv			17			DCV	microspheres	512 x 512	512 x 512	8	deconvolution	FluoSphere	microspheres	yellow-green	wide-field microscope	with a 60x, 1.45 NA oil-immersion objective.	80 x 80 nm	structured illumination microscope	with a 60x, 1.45 NA oil-immersion objective.	80 x 80 nm
vmsim568-bead-patch-dcv			18			DCV	microspheres	512 x 512	512 x 512	8	deconvolution	FluoSphere	microspheres	red-yellow	wide-field microscope	with a 60x, 1.45 NA oil-immersion objective.	80 x 80 nm	structured illumination microscope	with a 60x, 1.45 NA oil-immersion objective.	80 x 80 nm
vmsim647-bead-patch-dcv			19			DCV	microspheres	512 x 512	512 x 512	8	deconvolution	FluoSphere	microspheres	dark red	wide-field microscope	with a 60x, 1.45 NA oil-immersion objective.	80 x 80 nm	structured illumination microscope	with a 60x, 1.45 NA oil-immersion objective.	80 x 80 nm
biotisr-ccp-dcv-1			20		34	DCV	CCP	512 x 512	1024 x 1024	8	deconvolution	live SUM-159 cell	clathrin-coated pits	mEmerald (green)	wide-field microscope	with excitation numerical aperture (NA) of 1.41.	60.4 x 60.4 nm	linear structured illumination microscope	with excitation numerical aperture (NA) of 1.41.	60.4 x 60.4 nm
biotisr-ccp-dcv-2			21		35	DCV	CCP	512 x 512	1024 x 1024	8	deconvolution	live SUM-159 cell	clathrin-coated pits	mEmerald (green)	wide-field microscope	with excitation numerical aperture (NA) of 1.41.	60.4 x 60.4 nm	linear structured illumination microscope	with excitation numerical aperture (NA) of 1.41.	60.4 x 60.4 nm
biotisr-ccp-dcv-3			22		36	DCV	CCP	512 x 512	1024 x 1024	8	deconvolution	live SUM-159 cell	clathrin-coated pits	mEmerald (green)	wide-field microscope	with excitation numerical aperture (NA) of 1.41.	60.4 x 60.4 nm	linear structured illumination microscope	with excitation numerical aperture (NA) of 1.41.	60.4 x 60.4 nm
biotisr-factin-dcv-1			23		37	DCV	F-actin	512 x 512	1024 x 1024	8	deconvolution	live COS-7 cell	actin filament	mEmerald (green)	wide-field microscope	with excitation numerical aperture (NA) of 1.41.	60.4 x 60.4 nm	linear structured illumination microscope	with excitation numerical aperture (NA) of 1.41.	60.4 x 60.4 nm
biotisr-factin-dcv-2			24		38	DCV	F-actin	512 x 512	1024 x 1024	8	deconvolution	live COS-7 cell	actin filament	mEmerald (green)	wide-field microscope	with excitation numerical aperture (NA) of 1.41.	60.4 x 60.4 nm	linear structured illumination microscope	with excitation numerical aperture (NA) of 1.41.	60.4 x 60.4 nm
biotisr-factin-dcv-3			25		39	DCV	F-actin	512 x 512	1024 x 1024	8	deconvolution	live COS-7 cell	actin filament	mEmerald (green)	wide-field microscope	with excitation numerical aperture (NA) of 1.41.	60.4 x 60.4 nm	linear structured illumination microscope	with excitation numerical aperture (NA) of 1.41.	60.4 x 60.4 nm
biotisr-factin-nonlinear-dcv-1			26		40	DCV	F-actin	512 x 512	1536 x 1536	8	deconvolution	live COS-7 cell	actin filament	Skylan-NS (green)	wide-field microscope	with excitation numerical aperture (NA) of 1.41.	60.4 x 60.4 nm	non-linear structured illumination microscope	with excitation numerical aperture (NA) of 1.41.	60.4 x 60.4 nm
biotisr-factin-nonlinear-dcv-2			27		41	DCV	F-actin	512 x 512	1536 x 1536	8	deconvolution	live COS-7 cell	actin filament	Skylan-NS (green)	wide-field microscope	with excitation numerical aperture (NA) of 1.41.	60.4 x 60.4 nm	non-linear structured illumination microscope	with excitation numerical aperture (NA) of 1.41.	60.4 x 60.4 nm
biotisr-factin-nonlinear-dcv-3			28		42	DCV	F-actin	512 x 512	1536 x 1536	8	deconvolution	live COS-7 cell	actin filament	Skylan-NS (green)	wide-field microscope	with excitation numerical aperture (NA) of 1.41.	60.4 x 60.4 nm	non-linear structured illumination microscope	with excitation numerical aperture (NA) of 1.41.	60.4 x 60.4 nm
biotisr-lysosome-dcv-1			29		43	DCV	lysosome	512 x 512	1024 x 1024	8	deconvolution	live COS-7 cell	lysosome	yellow	wide-field microscope	with excitation numerical aperture (NA) of 1.35.	60.4 x 60.4 nm	linear structured illumination microscope	with excitation numerical aperture (NA) of 1.35.	60.4 x 60.4 nm
biotisr-lysosome-dcv-2			30		44	DCV	lysosome	512 x 512	1024 x 1024	8	deconvolution	live COS-7 cell	lysosome	yellow	wide-field microscope	with excitation numerical aperture (NA) of 1.35.	60.4 x 60.4 nm	linear structured illumination microscope	with excitation numerical aperture (NA) of 1.35.	60.4 x 60.4 nm
biotisr-lysosome-dcv-3			31		45	DCV	lysosome	512 x 512	1024 x 1024	8	deconvolution	live COS-7 cell	lysosome	yellow	wide-field microscope	with excitation numerical aperture (NA) of 1.35.	60.4 x 60.4 nm	linear structured illumination microscope	with excitation numerical aperture (NA) of 1.35.	60.4 x 60.4 nm
biotisr-mt-dcv-1			32		46	DCV	MT	512 x 512	1024 x 1024	8	deconvolution	live COS-7 cell	microtubule	mEmerald (green)	wide-field microscope	with excitation numerical aperture (NA) of 1.35.	60.4 x 60.4 nm	linear structured illumination microscope	with excitation numerical aperture (NA) of 1.35.	60.4 x 60.4 nm
biotisr-mt-dcv-2			33		47	DCV	MT	512 x 512	1024 x 1024	8	deconvolution	live COS-7 cell	microtubule	mEmerald (green)	wide-field microscope	with excitation numerical aperture (NA) of 1.35.	60.4 x 60.4 nm	linear structured illumination microscope	with excitation numerical aperture (NA) of 1.35.	60.4 x 60.4 nm
biotisr-mt-dcv-3			34		48	DCV	MT	512 x 512	1024 x 1024	8	deconvolution	live COS-7 cell	microtubule	mEmerald (green)	wide-field microscope	with excitation numerical aperture (NA) of 1.35.	60.4 x 60.4 nm	linear structured illumination microscope	with excitation numerical aperture (NA) of 1.35.	60.4 x 60.4 nm
rcan3d-dn-actin-dn			35		62	DN	F-actin	1550 x 1920	1550 x 1920	8	denoising	fixed U2OS cell	actin filament	Alexa Fluor 488 (green)	instant structured illumination microscope	with a 60x /1.42 numerical aperture (NA) oil objective (Olympus).	50 x 50 nm	instant structured illumination microscope	with a 60x/1.42 numerical aperture (NA) oil objective (Olympus).	50 x 50 nm
rcan3d-dn-er-dn			36		59	DN	ER	1550 x 1920	1550 x 1920	8	denoising	fixed U2OS cell	endoplasmic reticulum	GFP (green)	instant structured illumination microscope	with a 60x /1.42 numerical aperture (NA) oil objective (Olympus).	50 x 50 nm	instant structured illumination microscope	with a 60x/1.42 numerical aperture (NA) oil objective (Olympus).	50 x 50 nm
rcan3d-dn-lysosome-dn			37		63	DN	lysosome	1550 x 1920	1550 x 1920	8	denoising	fixed U2OS cell	lysosome	mApple (RFP)	instant structured illumination microscope	with a 60x /1.42 numerical aperture (NA) oil objective (Olympus).	50 x 50 nm	instant structured illumination microscope	with a 60x/1.42 numerical aperture (NA) oil objective (Olympus).	50 x 50 nm
rcan3d-dn-mixtrixmito-dn			38		64	DN	Mito	1550 x 1920	1550 x 1920	8	denoising	fixed U2OS cell	mitochondria	Alexa Fluor 488 (green)	instant structured illumination microscope	with a 60x /1.42 numerical aperture (NA) oil objective (Olympus).	50 x 50 nm	instant structured illumination microscope	with a 60x/1.42 numerical aperture (NA) oil objective (Olympus).	50 x 50 nm
rcan3d-dn-mt-dn			39		65	DN	MT	1550 x 1920	1550 x 1920	8	denoising	fixed U2OS cell	microtubule	mEmerald (GFP)	instant structured illumination microscope	with a 60x /1.42 numerical aperture (NA) oil objective (Olympus).	50 x 50 nm	instant structured illumination microscope	with a 60x/1.42 numerical aperture (NA) oil objective (Olympus).	50 x 50 nm
rcan3d-dn-tomm20mito-dn			40		61	DN	Mito	1550 x 1920	1550 x 1920	8	denoising	fixed U2OS cell	mitochondria	GFP (green)	instant structured illumination microscope	with a 60x /1.42 numerical aperture (NA) oil objective (Olympus).	50 x 50 nm	instant structured illumination microscope	with a 60x/1.42 numerical aperture (NA) oil objective (Olympus).	50 x 50 nm
biotisr-ccp-dn-1			41		49	DN	CCP	512 x 512	512 x 512	8	denoising	live SUM-159 cell	clathrin-coated pits	mEmerald (green)	wide-field microscope	with excitation numerical aperture (NA) of 1.41.	60.4 x 60.4 nm	wide-field microscope	with excitation numerical aperture (NA) of 1.41.	60.4 x 60.4 nm
biotisr-ccp-dn-2			42		50	DN	CCP	512 x 512	512 x 512	8	denoising	live SUM-159 cell	clathrin-coated pits	mEmerald (green)	wide-field microscope	with excitation numerical aperture (NA) of 1.41.	60.4 x 60.4 nm	wide-field microscope	with excitation numerical aperture (NA) of 1.41.	60.4 x 60.4 nm
biotisr-factin-dn-1			43		51	DN	F-actin	512 x 512	512 x 512	8	denoising	live COS-7 cell	actin filament	mEmerald (green)	wide-field microscope	with excitation numerical aperture (NA) of 1.41.	60.4 x 60.4 nm	wide-field microscope	with excitation numerical aperture (NA) of 1.41.	60.4 x 60.4 nm
biotisr-factin-dn-2			44		52	DN	F-actin	512 x 512	512 x 512	8	denoising	live COS-7 cell	actin filament	mEmerald (green)	wide-field microscope	with excitation numerical aperture (NA) of 1.41.	60.4 x 60.4 nm	wide-field microscope	with excitation numerical aperture (NA) of 1.41.	60.4 x 60.4 nm
biotisr-lysosome-dn-1			45		53	DN	lysosome	512 x 512	512 x 512	8	denoising	live COS-7 cell	lysosome	yellow	wide-field microscope	with excitation numerical aperture (NA) of 1.35.	60.4 x 60.4 nm	wide-field microscope	with excitation numerical aperture (NA) of 1.35.	60.4 x 60.4 nm
biotisr-lysosome-dn-2			46		54	DN	lysosome	512 x 512	512 x 512	8	denoising	live COS-7 cell	lysosome	yellow	wide-field microscope	with excitation numerical aperture (NA) of 1.35.	60.4 x 60.4 nm	wide-field microscope	with excitation numerical aperture (NA) of 1.35.	60.4 x 60.4 nm
biotisr-mt-dn-1			47		55	DN	MT	512 x 512	512 x 512	8	denoising	live COS-7 cell	microtubule	mEmerald (green)	wide-field microscope	with excitation numerical aperture (NA) of 1.35.	60.4 x 60.4 nm	wide-field microscope	with excitation numerical aperture (NA) of 1.35.	60.4 x 60.4 nm
biotisr-mt-dn-2			48		56	DN	MT	512 x 512	512 x 512	8	denoising	live COS-7 cell	microtubule	mEmerald (green)	wide-field microscope	with excitation numerical aperture (NA) of 1.35.	60.4 x 60.4 nm	wide-field microscope	with excitation numerical aperture (NA) of 1.35.	60.4 x 60.4 nm
biotisr-mito-dn-1			49		57	DN	Mito	512 x 512	512 x 512	8	denoising	live COS-7 cell	mitochondria	mEmerald (green)	wide-field microscope	with excitation numerical aperture (NA) of 1.35.	60.4 x 60.4 nm	wide-field microscope	with excitation numerical aperture (NA) of 1.35.	60.4 x 60.4 nm
biotisr-mito-dn-2			50		58	DN	Mito	512 x 512	512 x 512	8	denoising	live COS-7 cell	mitochondria	mEmerald (green)	wide-field microscope	with excitation numerical aperture (NA) of 1.35.	60.4 x 60.4 nm	wide-field microscope	with excitation numerical aperture (NA) of 1.35.	60.4 x 60.4 nm
hl60-high-noise-c00					0	DN	nuclei	565 x 807	N/A	8	denoising	HL60 cell	nuclei	unknown	confocal microscope	with a Zeiss 63x/1.40 oil DIC objective	124 x 124 nm	confocal microscope	with a Zeiss 63x/1.40 oil DIC objective	124 x 124 nm
hl60-high-noise-c25					1	DN	nuclei	565 x 807	N/A	8	denoising	HL60 cell	nuclei	unknown	confocal microscope	with a Zeiss 63x/1.40 oil DIC objective	124 x 124 nm	confocal microscope	with a Zeiss 63x/1.40 oil DIC objective	124 x 124 nm
hl60-high-noise-c50					2	DN	nuclei	565 x 807	N/A	8	denoising	HL60 cell	nuclei	unknown	confocal microscope	with a Zeiss 63x/1.40 oil DIC objective	124 x 124 nm	confocal microscope	with a Zeiss 63x/1.40 oil DIC objective	124 x 124 nm
hl60-high-noise-c75					3	DN	nuclei	565 x 807	N/A	8	denoising	HL60 cell	nuclei	unknown	confocal microscope	with a Zeiss 63x/1.40 oil DIC objective	124 x 124 nm	confocal microscope	with a Zeiss 63x/1.40 oil DIC objective	124 x 124 nm
hl60-low-noise-c00					4	DN	nuclei	565 x 807	N/A	8	denoising	HL60 cell	nuclei	unknown	confocal microscope	with a Zeiss 63x/1.40 oil DIC objective	124 x 124 nm	confocal microscope	with a Zeiss 63x/1.40 oil DIC objective	124 x 124 nm
hl60-low-noise-c25					5	DN	nuclei	565 x 807	N/A	8	denoising	HL60 cell	nuclei	unknown	confocal microscope	with a Zeiss 63x/1.40 oil DIC objective	124 x 124 nm	confocal microscope	with a Zeiss 63x/1.40 oil DIC objective	124 x 124 nm
hl60-low-noise-c50					6	DN	nuclei	565 x 807	N/A	8	denoising	HL60 cell	nuclei	unknown	confocal microscope	with a Zeiss 63x/1.40 oil DIC objective	124 x 124 nm	confocal microscope	with a Zeiss 63x/1.40 oil DIC objective	124 x 124 nm
hl60-low-noise-c75					7	DN	nuclei	565 x 807	N/A	8	denoising	HL60 cell	nuclei	unknown	confocal microscope	with a Zeiss 63x/1.40 oil DIC objective	124 x 124 nm	confocal microscope	with a Zeiss 63x/1.40 oil DIC objective	124 x 124 nm
scaffold-a549-dn					8	DN	nuclei	512 x 512	N/A	8	denoising	human non-small cell lung cancer	nuclei	Hoechst 33342 (blue)	confocal microscope	with an air EC Plan-Neofluar 20X/0.5 air immersion objective	415 x 415 nm	confocal microscope	with an air EC Plan-Neofluar 20X/0.5 air immersion objective	415 x 415 nm
colon-tissue-dcv-high					9	DCV	nuclei	1030 x 1300	N/A	8	deconvolution	human colon tissue	nuclei	unknown	confocal microscope	with a Zeiss 63x/1.40 oil DIC objective	124 x 124 nm	ground truth		124 x 124 nm
hl60-high-noise-c00-dcv					10	DCV	nuclei	565 x 807	N/A	8	deconvolution	HL60 cell	nuclei	unknown	confocal microscope	with a Zeiss 63x/1.40 oil DIC objective	124 x 124 nm	ground truth		124 x 124 nm
hl60-high-noise-c25-dcv					11	DCV	nuclei	565 x 807	N/A	8	deconvolution	HL60 cell	nuclei	unknown	confocal microscope	with a Zeiss 63x/1.40 oil DIC objective	124 x 124 nm	ground truth		124 x 124 nm
hl60-high-noise-c50-dcv					12	DCV	nuclei	565 x 807	N/A	8	deconvolution	HL60 cell	nuclei	unknown	confocal microscope	with a Zeiss 63x/1.40 oil DIC objective	124 x 124 nm	ground truth		124 x 124 nm
hl60-high-noise-c75-dcv					13	DCV	nuclei	565 x 807	N/A	8	deconvolution	HL60 cell	nuclei	unknown	confocal microscope	with a Zeiss 63x/1.40 oil DIC objective	124 x 124 nm	ground truth		124 x 124 nm
hl60-low-noise-c00-dcv					14	DCV	nuclei	565 x 807	N/A	8	deconvolution	HL60 cell	nuclei	unknown	confocal microscope	with a Zeiss 63x/1.40 oil DIC objective	124 x 124 nm	ground truth		124 x 124 nm
hl60-low-noise-c25-dcv					15	DCV	nuclei	565 x 807	N/A	8	deconvolution	HL60 cell	nuclei	unknown	confocal microscope	with a Zeiss 63x/1.40 oil DIC objective	124 x 124 nm	ground truth		124 x 124 nm
hl60-low-noise-c50-dcv					16	DCV	nuclei	565 x 807	N/A	8	deconvolution	HL60 cell	nuclei	unknown	confocal microscope	with a Zeiss 63x/1.40 oil DIC objective	124 x 124 nm	ground truth		124 x 124 nm
hl60-low-noise-c75-dcv					17	DCV	nuclei	565 x 807	N/A	8	deconvolution	HL60 cell	nuclei	unknown	confocal microscope	with a Zeiss 63x/1.40 oil DIC objective	124 x 124 nm	ground truth		124 x 124 nm
